1 Characterization of genes and alleles involved in the control of flowering  
2 time in grapevine

3  
4 Nadia Kamal<sup>1,#a</sup>, Iris Ochßner<sup>2</sup>, Anna Schwandner<sup>2</sup>, Prisca Viehöver<sup>1</sup>, Ludger Hausmann<sup>2</sup>, Reinhard  
5 Töpfer<sup>2</sup>, Bernd Weisshaar<sup>1\*</sup> and Daniela Holtgräwe<sup>1</sup>

6  
7 <sup>1</sup> Bielefeld University, Faculty of Biology & Center for Biotechnology, Bielefeld, Germany

8 <sup>2</sup> Julius Kühn-Institute (JKI), Institute for Grapevine Breeding Geilweilerhof, Siebeldingen, Germany

9 <sup>#a</sup> Helmholtz Center Munich, Plant Genome and Systems Biology, Munich, Germany

10

11 Email addresses:

12 Nadia Kamal (NK); [nadia.kamal@helmholtz-muenchen.de](mailto:nadia.kamal@helmholtz-muenchen.de)

13 Iris Ochßner (IO); [i.ochssner@gmx.de](mailto:i.ochssner@gmx.de)

14 Anna Schwandner (AS); [Anna.schwandner@julius-kuehn.de](mailto:Anna.schwandner@julius-kuehn.de)

15 Prisca Viehöver (PV); [viehoeve@cebitec.uni-bielefeld.de](mailto:viehoeve@cebitec.uni-bielefeld.de)

16 Ludger Hausmann (LH); [ludger.hausmann@julius-kuehn.de](mailto:ludger.hausmann@julius-kuehn.de)

17 Reinhard Töpfer (RT); [reinhard.toepfer@julius-kuehn.de](mailto:reinhard.toepfer@julius-kuehn.de)

18 Bernd Weisshaar (BW); [bernd.weisshaar@uni-bielefeld.de](mailto:bernd.weisshaar@uni-bielefeld.de)

19 Daniela Holtgräwe (DH); [dholtgra@cebitec.uni-bielefeld.de](mailto:dholtgra@cebitec.uni-bielefeld.de)

20 \* Corresponding Author

21 E-mail: [dholtgra@cebitec.uni-bielefeld.de](mailto:dholtgra@cebitec.uni-bielefeld.de) (DH)

22

23 ORCIDS

24 Ludger Hausmann; ORCID: 0000-0002-4046-9626

25 Reinhard Töpfer; ORCID: 0000-0003-1569-2495

26 Bernd Weisshaar; ORCID: 0000-0002-7635-3473

27 Daniela Holtgräwe; ORCID: 0000-0002-1062-4576

28 Nadia Kamal; ORCID: 0000-0002-3258-4130

29

30

31



## 33 **Abstract**

34 Grapevine (*Vitis vinifera*) is one of the most important perennial crop plants in worldwide.  
35 Understanding of developmental processes like flowering, which impact quality and quantity of yield  
36 in this species is therefore of high interest. This gets even more important when considering some of  
37 the expected consequences of climate change. Earlier bud burst and flowering, for example, may  
38 result in yield loss due to spring frost. Berry ripening under higher temperatures will impact wine  
39 quality. Knowledge of interactions between a genotype or allele combination and the environment  
40 can be used for the breeding of genotypes that are better adapted to new climatic conditions. To this  
41 end, we have generated a list of more than 500 candidate genes that may play a role in the timing of  
42 flowering. The grapevine genome was exploited for flowering time control gene homologs on the  
43 basis of functional data from model organisms like *A. thaliana*. In a previous study, a mapping  
44 population derived from early flowering GF.GA-47-42 and late flowering ‘Villard Blanc’ was  
45 analyzed for flowering time QTLs. In a second step we have now established a workflow combining  
46 amplicon sequencing and bioinformatics to follow alleles of selected candidate genes in the F<sub>1</sub>  
47 individuals and the parental genotypes. Allele combinations of these genes in individuals of the  
48 mapping population were correlated with early or late flowering phenotypes. Specific allele  
49 combinations of flowering time candidate genes within and outside of the QTL regions for flowering  
50 time on chromosome 1, 4, 14, 17, and 18 were found to be associated with an early flowering  
51 phenotype. In addition, expression of many of the flowering candidate genes was analyzed over  
52 consecutive stages of bud and inflorescence development indicating functional roles of these genes in  
53 the flowering control network.

## 54 Introduction

55 The reproductive developmental cycle of grapevine spans two years (S1 Figure). Grapevine plants  
56 need intense light and high temperatures to initiate inflorescences during spring, which develop and  
57 flower during the subsequent summer [1]. The ongoing tendency to higher temperatures in spring  
58 due to global warming causes earlier bud burst and flowering [2]. As a consequence, late spring  
59 frost is an increasing risk to viticulture, which may cause significant crop loss [3]. Together with  
60 flowering the onset of ripening is shifted towards earlier dates [4,5] and the ripening process occurs  
61 under warmer conditions. This influences berry composition [6], affects wine quality and promotes  
62 e.g. fungi infection. Grapevine breeding programs aim to keep the production of high quality grapes  
63 in a changing environment consistent. Making use of late flowering genotypes may be one approach  
64 to compensate for earlier ripening. Understanding the flowering process in grapevine and  
65 determining factors that lead to early or late flowering may help to control variation in berry  
66 production [7].

67 Detailed knowledge of pathways controlling flowering is available in crop species and the woody  
68 plant poplar, but especially the model species *A. thaliana* and rice [8,9]. With the availability of a  
69 *Vitis* reference genome sequence [10-14], gene homologs to *A. thaliana* floral development pathway  
70 genes or genes involved in photoperiod or vernalization responses could be identified in the  
71 grapevine genome. Most of these are flowering signal integrators, floral meristem identity genes,  
72 and flower organ identity genes, such as MADS box genes, like *VvMADS8* that promotes early  
73 flowering and the *VvFT/TFL1* gene family [15-17]. The expression of *VvFT* - the ortholog of the *A.*  
74 *thaliana* *FLOWERING LOCUS T* - is associated with seasonal flowering induction in latent buds  
75 and the development of inflorescences, flowers, and fruits [18]. The expression of the *LEAFY*  
76 ortholog *VvFL* is correlated with inflorescence and flower development [15]. *VvFUL-L* and *VvAPI* -  
77 homologs of the *A. thaliana* genes *FUL* and *API* - are suggested to act on the specification of  
78 flower organ identity as their expression appears in early developmental stages of lateral meristems  
79 and is maintained in both inflorescence and tendril primordia [16,19].

80 Due to the high heterozygosity and severe inbreeding depression, the first filial generation ( $F_1$ ) is  
81 used for QTL (quantitative trait loci) mapping in *V. vinifera*. This is different to other crop or model  
82 species (and is called a double pseudo test cross approach; [20,21]). Several QTL for the timing of  
83 developmental stages such as flowering time have been identified [2,22,23]. One locus contributing  
84 to flowering time control (FTC) was reported in 2006 [24]. Six QTL on different chromosomes  
85 (chr) in the mapping population GF.GA-47-42 x 'Villard Blanc' were described in [23]. The

87 also found in another mapping population derived from the genotypes V3125 and 'Börner' [23].  
88 MADS-box genes with a proposed impact on flowering time such as *VvFL*, *VvFUL-L* and *VvAPI*  
89 were annotated within FTC QTL regions in *Vitis*. Further, examples of flowering time gene  
90 homologues in such QTL regions include *CONSTANS-like* genes on chr 1, 4 and 14 and the MADS-  
91 box genes, *VvFLC1* und *VvFLC2* (*Vitis vinifera* FLOWERING LOCUS C 1 & 2), which are highly  
92 expressed in buds [25].

93 The observation that either very early or very late flowering seems to be inherited by specific  
94 combinations of alleles at several loci, while all mixed combinations lead to an intermediate  
95 flowering type indicates an additive effect. The data further suggest a dominant effect for early  
96 flowering, with the responsible alleles being inherited from either 'Bacchus' or 'Seyval', the parents  
97 of the breeding line GF.GA-47-42 [23]. In order to link certain alleles of the sequenced genes to the  
98 flowering time phenotype, the two allele sequences of a given gene in a heterozygous diploid plant  
99 have to be determined (allele phasing).

100 Short read sequencing technologies still suffer from producing ambiguous haplotype phase  
101 sequences. Determining the haplotype phase of an individual is computationally challenging and  
102 experimentally expensive; but haplotype phase information is crucial in various analyses, such as  
103 genetic association studies, the reconstruction of phylogenies and pedigrees, genomic imputation,  
104 linkage disequilibrium, and SNP tagging [26,27][28,29]. In diploid organisms like grapevine,  
105 generally both alleles of a given gene are expressed. Different alleles can show different expression  
106 patterns, which can consequently result in varying manifestations of traits. The determination of  
107 these alleles is an important step in the dissection of corresponding traits. Among other approaches,  
108 haplotypic information can be obtained from DNA sequence fragments to reconstruct the two  
109 haplotypes of a diploid individual. A sequence fragment that covers at least two variant sites in a  
110 genome can link those variants together and thus phase them. When fragments are long enough to  
111 encompass multiple variant sites and the sequencing coverage is sufficiently high to provide  
112 overlaps between fragments, fragments can be assembled to reconstruct longer haplotypes [30].

113 For haplotype or allele phasing a variant discovery process is necessary beforehand. The two  
114 mainly used methods are based on Shotgun Genome Assembly (SGA) or on amplicon sequencing.  
115 SGA generates phasing information without knowledge of the surrounding sequence, the library  
116 coverage needs to be high and it is computationally very challenging to distinguish paralogous  
117 repeats from polymorphism but it does not require sequence information for the loci. Amplicon  
118 sequencing, which includes the amplification of a genomic region by PCR, requires sequence

120 not practical for large-scale projects [31].

121 In this work, we used a F<sub>1</sub> population of *V. vinifera*, with the aim to associate allele sequences of  
122 several FTC candidate genes with the phenotype of flowering time in order to identify alleles  
123 influencing and controlling this trait using amplicon sequencing. Gene expression was analyzed in  
124 different time courses of bud and flower development in order to further investigate and confirm the  
125 role of FTC candidate genes.

## 126 **Materials and Methods**

### 127 **Plant material**

128 The mapping population GF.GA-47-42 x ‘Villard Blanc’ was crossed in 1989 using the breeding  
129 line GF.GA-47-42 (‘Calardis Musque’; ‘Bacchus Weiss’ x ‘Seyval’) and the cultivar ‘Villard  
130 Blanc’ (Seibel 6468 x ‘Subereux’). The 151 F<sub>1</sub> individuals were planted in the vineyards at the  
131 Institute for Grapevine Breeding Geilweilerhof in Siebeldingen (49°13'05.0"N 8°02'45.0"E) in  
132 Southwestern Germany ([www.julius-kuehn.de/en/grapevine-breeding](http://www.julius-kuehn.de/en/grapevine-breeding)) in 1996. The offspring  
133 shows notable segregation for the trait "flowering time" as the maternal breeding line GF.GA-47-42  
134 and its parents are early flowering while the paternal line ‘Villard Blanc’ as well as its parents  
135 flower rather late. QTL analysis for flowering time was carried out using a SSR marker-based  
136 genetic map of the biparental population [32].

137 Phenotyping of the mapping population GF.GA-47-42 x ‘Villard Blanc’ was performed for  
138 flowering time (full bloom) in nine years (1999, 2009 - 2016) as described in [23] (Table 1, S1  
139 Table). For determination of the median of flowering time for each individual, the days of the  
140 flowering period of each year were numbered whereas the first day of the flowering period was  
141 numbered with one, the second day with two, etc. These numbers were then divided by the length of  
142 the flowering period. The resulting values were used to calculate the median. Values for global  
143 radiation and accumulated temperature from November 1<sup>st</sup> of the previous year until the day of full  
144 bloom were obtained from the DLR ([www.wetter.rlp.de](http://www.wetter.rlp.de)) and refer to the location of the vineyard at  
145 Siebeldingen, Germany. For gene expression analysis of FTC target genes, leaves, buds, and  
146 inflorescences from early flowering GF.GA-47-42 were collected at several consecutive time points  
147 starting from latent winter buds until inflorescences shortly before full bloom within the  
148 developmental cycle that was completed over the two consecutive years 2012 and 2013. Moreover,  
149 in 2013, sampling of buds on consecutive time points before dormancy in winter was continued.

151 different GF.GA-47-42 plants was harvested into liquid nitrogen. We decided in favor of single  
 152 samples but many time points to detect trends in expression levels. Table 2 shows an overview of  
 153 the collected samples.

154 Table 1: Dates of flowering periods of the mapping population GF.GA-47-42 x ‘Villard Blanc’ and  
 155 the amount of global radiation at the location of the vineyards (Geilweilerhof) if available.

| Year | Start of flowering period (days after January 1 <sup>st</sup> ) | End of flowering period (days after January 1 <sup>st</sup> ) | Length of flowering period (days) | Global radiation at beginning of flowering period (KWh/ m <sup>2</sup> ) | Global radiation at end of flowering period (KWh/ m <sup>2</sup> ) |
|------|-----------------------------------------------------------------|---------------------------------------------------------------|-----------------------------------|--------------------------------------------------------------------------|--------------------------------------------------------------------|
| 1999 | 165                                                             | 178                                                           | 14                                | /                                                                        | /                                                                  |
| 2009 | 156                                                             | 170                                                           | 15                                | /                                                                        | /                                                                  |
| 2010 | 151                                                             | 180                                                           | 19                                | /                                                                        | /                                                                  |
| 2011 | 147                                                             | 157                                                           | 11                                | 531                                                                      | 579                                                                |
| 2012 | 153                                                             | 169                                                           | 17                                | 511                                                                      | 596                                                                |
| 2013 | 168                                                             | 183                                                           | 16                                | 516                                                                      | 597                                                                |
| 2014 | 150                                                             | 161                                                           | 12                                | 518                                                                      | 567                                                                |
| 2015 | 156                                                             | 167                                                           | 12                                | 536                                                                      | 595                                                                |
| 2016 | 168                                                             | 177                                                           | 10                                | 502                                                                      | 548                                                                |

156

157 Table 2: Samples collected from grapevine genotype GF.GA-47-42 for the analysis of trends in  
 158 gene expression levels. Listed are developmental stage and the corresponding BBCH code.

| Date of sample collection        | Developmental stage | BBCH code |
|----------------------------------|---------------------|-----------|
| Developmental cycle 2012/2013:   |                     |           |
| December 20 <sup>th</sup> , 2012 | dormant bud         | BBCH 0    |
| March 8 <sup>th</sup> , 2013     | dormant bud         | BBCH 0    |

|                                   |                            |            |
|-----------------------------------|----------------------------|------------|
| March 22 <sup>nd</sup> , 2013     | swelling bud               | BBCH 0-5   |
| April 12 <sup>th</sup> , 2013     | swelling bud               | BBCH 5-9   |
| April 26 <sup>th</sup> , 2013     | swelling bud/ first leaves | BBCH 11    |
| May 3 <sup>rd</sup> , 2013        | buds/ first leaves         | BBCH 11-13 |
| June 7 <sup>th</sup> , 2013       | inflorescences & leaves    | BBCH 53    |
| June 14 <sup>th</sup> , 2013      | inflorescences & leaves    | BBCH 55    |
| June 17 <sup>th</sup> , 2013      | inflorescences             | BBCH 57    |
| Developmental cycle 2013/2014:    |                            |            |
| July 22 <sup>nd</sup> , 2013      | buds & leaves              | /          |
| August 2 <sup>nd</sup> , 2013     | buds                       | /          |
| August 8 <sup>th</sup> , 2013     | buds & leaves              | /          |
| August 16 <sup>th</sup> , 2013    | buds                       | /          |
| August 22 <sup>nd</sup> , 2013    | buds & leaves              | /          |
| September 5 <sup>th</sup> , 2013  | buds                       | /          |
| September 19 <sup>th</sup> , 2013 | leaves                     | /          |

159

## 160 **FTC candidate gene prediction**

161 For the identification and characterization of putative flowering time control (FTC) genes,  
 162 functional data from well studied model species was used to exploit the grapevine genome for  
 163 homologous genes. Using BLAST (e-value cut off below 1e-25) [34] protein sequences of  
 164 candidate genes from *A. thaliana* and other model species were compared against the *Vitis* protein  
 165 sequences (PN40024-12xv0, Genoscope gene prediction 12X.v0  
 166 ([www.genoscope.cns.fr/externe/GenomeBrowser/Vitis/](http://www.genoscope.cns.fr/externe/GenomeBrowser/Vitis/)) and the CRIBI gene prediction 12X.v2  
 167 [12]). Results were manually checked for additional evidence from the literature.

168 For functional annotation of FTC candidate genes, the method of reciprocal best hits (RBH) [35]  
 169 was applied. A RBH pair consists of two sequences from different sets of sequences, each  
 170 displaying the highest genome wide score in the other data set. Genomic sequences of FTC genes  
 171 were compared against protein sequences of *V. vinifera* and *A. thaliana* with blastx. If a gene



173 highest score was compared back against *V. vinifera* coding genes. When the original query was  
174 found to have the highest score, the resulting RBH pair was considered.

175 To establish unique genes, we used the *Vv* (*Vitis vinifera*) prefix followed, for almost all genes, by  
176 the gene name deduced from the *Arabidopsis* annotation. In many cases the *Vitis* genome holds  
177 several putative homologs for known FTC genes from model crops, leading to low number of  
178 RBHs between *Vitis* and *Arabidopsis* genes. In order to distinguish these *Vitis* genes, the one with  
179 the highest BLAST score to the query gene got the name extension “a”, the second best the “b”.

## 180 **Amplimer design**

181 Genes for targeted allele phasing (target genes) through amplicon sequencing were selected out of  
182 the identified FTC candidate genes. The cDNA sequences of target genes were used as query in a  
183 BLAST against the grapevine reference sequence PN40024-12xv0. Genomic DNA sequences were  
184 extracted in addition to 1,000 bp from the 5'- and 3'-UTR regions. Primers were designed for  
185 overlapping amplimers of up to 8 kb using the tool Primer3 [36].

## 186 **DNA isolation and amplicon generation**

187 Extraction of genomic DNA was performed from young leaf tissue. The leaf material was grounded  
188 under liquid nitrogen and subsequently used for DNA isolation with the DNeasy® Plant Maxi Kit  
189 (Qiagen, Hilden, Germany) according to manufacturer’s protocols. The purified DNA was quality  
190 checked via gel electrophoresis and quantified using a NanoDrop spectrophotometer (Peqlab,  
191 Erlangen, Germany). Amplicons were amplified by long range PCR (98 °C 30 sec, 15 cycles of 10  
192 sec 98 °C, 30 sec 72 °C – 57 °C, 5 min 72 °C, 25 cycles 10 sec 98 °C, 30 sec 58 °C, 5 min 72 °C  
193 and finally 2 min 72 °C).

194 Target gene sequences were amplified from 37 individuals of the mapping population GF.GA-47-  
195 42 x ‘Villard Blanc’ including the parental lines and 35 F<sub>1</sub> individuals with early, intermediate and,  
196 late flowering time phenotypes (S2 Table).

## 197 **Library preparation and amplicon sequencing**

198 Amplicon sequencing was carried out on a MiSeq (Illumina, San Diego, USA) in seven runs. All  
199 amplicons belonging to a respective individual were pooled in equimolar amounts, fragmented by  
200 sonification using a Bioruptor (Diagenode, Denville, USA) and subsequently used for library  
201 preparation. The libraries were prepared as recommended by Illumina (TruSeq DNA Sample

202 Preparation v2. Guide. Adapter-ligated fragments were size selected on a two percent low melt  
203 agarose gel to an average insert size of 500 bp. Fragments that carry adaptors on both ends were  
204 enriched by PCR. Final libraries were quantified using PicoGreen (Quant-iT, Fisher Scientific,  
205 Schwerte, Germany) on a Fluostar plater reader (BMG labtech, Ortenberg, Germany) and quality  
206 checked by HS-Chips on a 2100 Bioanalyzer (Agilent Technologies, Santa Clara, USA). Up to 20  
207 libraries were pooled and sequenced on an Illumina MiSeq platform with 2 x 250 bp read length  
208 using the Illumina MiSeq v2 reagents. After sequencing, basecalling and demultiplexing and  
209 FASTQ file generation was performed using a casava-based in house script.

## 210 **Read processing and mapping**

211 Adapter trimming of raw reads and quality filtering of reads with a window of four consecutive  
212 bases that exhibited a quality value below 30 was performed using Trimmomatic [37]. Bases at the  
213 heads and tails of the reads with quality values below 30 were cropped using Trimmomatic. Before  
214 and after trimming the tool FastQC ([www.bioinformatics.babraham.ac.uk/projects/fastqc](http://www.bioinformatics.babraham.ac.uk/projects/fastqc)) was used  
215 to check the quality of the reads. Between 11.5 and 35.6% (20.2% on average [standard deviation  
216 (SD): 5.5%]) of reads were dropped through trimming. Trimmed reads were mapped to the  
217 grapevine reference sequence PN40024 12x.v2 [14] using the BWA-MEM algorithm which is  
218 suitable for long reads with default parameters [38]. Mapping was performed for each individual  
219 separately. Instead of the entire reference sequence the target gene sequences only were chosen for  
220 mapping in order to prevent false positive mapping results. The SAM format files were converted to  
221 BAM format files and sorted using SAMtools [39]. Readgroups were added and duplicated reads  
222 removed using Picard Tools (<https://broadinstitute.github.io/picard/>). Besides PCR duplicates  
223 unpaired reads were removed from the mapping files. About 15% of amplicons failed to be  
224 amplified or sequencing depth was below 20.

## 225 **Allele phasing of target genes**

226 In order to separate the two alleles of the sequenced target genes (phasing), a workflow using the  
227 Genome Analysis Toolkit (GATK) [40] was established (Fig. 1). After read alignment, the quality  
228 of the alignments was improved in two ways. Firstly, local realignments around InDels were  
229 performed using InDelRealigner of GATK [40] to reduce the number of misalignments.  
230 Occasionally, the presence of insertions or deletions in individuals with respect to the reference  
231 genome sequence leads to misalignments of reads to the reference, especially when InDels are  
232 covered at the start or end of a read. Such misalignments lead to many false positive SNPs.  
233 Secondly, base quality scores of reads in the aligned mapping files were recalibrated using

235 sequence context. Thus, more accurate and more widely dispersed quality scores are provided.

236 Fig. 1: Workflow using the Genome Analysis Toolkit (GATK), which uses the high-coverage  
237 genotype sequence variation information and the family relationship for phasing.

238 Using the HaplotypeCaller of GATK variants were called for each individual separately. The ploidy  
239 parameter was set to 12 for variant calling. It was performed in gVCF mode for F<sub>1</sub> individuals and  
240 the parental lines of the population GF.GA-47-42 x ‘Villard Blanc’. Cases of allele dropout were  
241 identified, in which the missing allele leads to genotyping errors. Since we were working with an F<sub>1</sub>  
242 population and by applying Mendelian constraints it was possible to determine which allele was  
243 missing within the population GF.GA-47-42 x ‘Villard Blanc’, but its sequence remained unknown.  
244 After variant calling, resulting variant files from individuals of the population were merged using  
245 GATK's GenotypeGVCFs in order to apply further downstream steps on all samples together. At  
246 each position of the input gVCFs, this tool combines all spanning records and outputs them to a  
247 new variant file. Raw variants were hard-filtered according to GATK's "Best Practices"  
248 recommendations [41,42]. In addition, variants with read coverage depth and genotype quality  
249 below 20 were filtered out. For the determination of allele-specific sequences initially physical  
250 phasing was performed using HapCUT [30]. Fragments were defined from the sequenced reads.  
251 Haplotype-informative reads that cover at least two heterozygous variants were extracted from the  
252 aligned file using the tool extractHairs from HapCut and used for the assembly of haplotypes. The  
253 information of polymorphic sites was passed to HapCUT through a variant file. A maximum  
254 number of 600 iterations were used to run HapCut and the reference sequence was provided in order  
255 to extract reads covering both SNPs and InDels. Using various python scripts, intervals in which  
256 phasing could be performed in individuals of the population GF.GA-47-42 x ‘Villard Blanc’  
257 including the parents and F<sub>1</sub> individuals were determined and homozygous alternative variants were  
258 added to the variant files. Using GATK's FastaAlternateReferenceMaker FASTA-format files with  
259 alternate sequences were created for each individual within the regions in which allele phasing  
260 could be performed.

261 A nomenclature system was created for the alleles of genes within the population GF.GA-47-42 x  
262 ‘Villard Blanc’ (S3 Table). The system distinguishes between fourteen different cases, where four,  
263 three, or two different allele sequences can be present at a locus or all sequences can be identical.  
264 Moreover, it distinguishes between various combinations of two or three different sequences. E, as  
265 in E1, E2 and E0, refers to “early” and originates from early flowering GF.GA-47-42, while L, as in  
266 L1, L2 and L0 refers to “late” and originates from late flowering ‘Villard Blanc’. N means that both

268 while N2 means that E2 and L2 are alike. N means that either L2 and E1 or E2 and L1 are alike. Na  
269 means that E1, E2, and L1 are alike. Nb means that E1, E2, and L2 are alike. Nc means that E1, L1,  
270 and L2 are alike. Nd means that E2, L1, and L2 are alike. Descriptions for allele combinations that  
271 distinguish between which of the two alleles of one parental line is alike the two alleles of the other  
272 line (as in NaNa x NaL2) was implemented in order to be able to track patterns of allele  
273 combinations throughout QTL regions and closely neighboring genes.

## 274 **Correlation analysis**

275 To test for the correlation of an allele and the flowering time phenotype, a Wilcoxon Rank-Sum test  
276 was carried out between a dichotomous variable (the presence or absence of an allele) and a  
277 continuous variable (flowering time). The null hypothesis assumed that the median of flowering  
278 time between groups of individuals carrying a certain allele or not is equal. When p-values below  
279 5% were found, the null hypothesis was rejected and an association between an allele and the  
280 flowering time phenotype was found to exist.

## 281 **Marker development and testing of the whole mapping population**

282 After creating haplotype specific allele sequences through amplicon sequencing and the subsequent  
283 bioinformatic pipeline, markers were designed for haplotype specific PCRs. Obtained allele  
284 sequences of target genes were scanned for InDel structures differing between the parental alleles.  
285 Variants with low coverage or low quality were filtered out. In the case that InDels were filtered  
286 out, the actual allele sequence can be greater than the calculated one. The sequence information was  
287 used for subsequent STS (Sequence-Tagged Sites) marker design with the Primer3 tool [36].  
288 Primers had an optimum Tm of 58 - 60 °C, with PCR products differing in size between 100 – 400  
289 bp for multiplexing purposes (S7 Table). Forward primers were labeled at the 5' end with one of the  
290 fluorescent dyes 6-FAM (blue), HEX (green), TAMRA (yellow) or ROX (red). Allele distributions  
291 were analyzed over all 151 F<sub>1</sub> individuals of the mapping population GF.GA-47-42 x 'Villard  
292 Blanc'. PCRs were carried out with the QIAGEN multiplex PCR kit (Qiagen GmbH, Hilden,  
293 Germany) following the instructions of the manufacturer in three multiplexes combining different  
294 product sizes and fluorescent dyes. Resulting PCR products were analyzed on an ABI 3110xl  
295 Genetic Analyzer (Applied Biosystems, Foster City, USA) and the results compared with the  
296 respective phenotype of the tested individual (i.e. early, intermediate or late flowering).

## 297 **RNA extraction and sequencing**

299 Plant Total RNA kit (Sigma-Aldrich, Taufkirchen, Germany) according to the manufacturer's  
300 instructions for protocol B. After on-column DNase treatment with the DNase I Digest Set (Sigma-  
301 Aldrich, Taufkirchen, Germany) the RNA was quantified. RNA-libraries for each time point were  
302 prepared according to the Illumina TruSeq RNA Sample Preparation v2 Kit using an input of 1 µg  
303 of total RNA. RNA-Seq (1x 135 bp) was performed on an Illumina Rapid HiSeq-1500 Run. One  
304 barcoded library was created for each of the time points.

## 305 **RNA-Seq read processing for analysis of gene expression kinetics**

306 Read trimming and quality control was performed as described above in “Read processing and  
307 mapping”. Sequence read data are available from SRA accession SRP153932. The reads were  
308 mapped to the grapevine reference sequence PN40024 12x.v2 [14] using tophat2 [43] which is  
309 capable of performing split read mapping. The maximal intron size was set to 3000, otherwise  
310 default parameters were used. Resulting BAM-format files were sorted and indexed using  
311 SAMtools [39]. With HTSeq [44] mapped reads were counted for each gene. Differential gene  
312 expression was analyzed using the R-package DESeq2 [45]. In order to perform an analysis of  
313 expression without replicates, the counts were modeled as a smooth function of time, and an  
314 interaction term of the condition with the smooth function was included. Likelihood ratio test of  
315 DESeq2s with a reduced design, which does not include the interaction term, was then applied.  
316 Genes with small p-values from this test are those showing a time-specific effect.

## 317 **Results**

### 318 **Phenotypic evaluation of the mapping population**

319 The 151 F<sub>1</sub> individuals of the segregating population and their parental lines were phenotyped for  
320 time of full bloom as indicated in S2 Figure showing the timing of flowering in days after January  
321 1<sup>st</sup>. The length of the flowering period varied considerably between 10 days (2016) and 17 days  
322 (2012) [23]. In the year 2010 the flowering period was heavily extended compared to the other  
323 years. The greatest portion of individuals within the population reached full bloom in approximately  
324 the first third of the flowering period. Within the mapping population, early flowering is inherited  
325 from the maternal genotype GF.GA-47-42.

### 326 **Identification of FTC candidate genes**

327 identify FTC candidate genes in the *Vitis* reference genome sequence. More than 500 homologous  
328 genes were identified which are distributed over all chromosomes including the unanchored,  
329 random part of the sequence (S4 Table). Some of the genes are absent from the CRIBI annotations,  
330 but were included in the previous annotations, provided by Genoscope. To our knowledge the  
331 majority of the identified FTC candidate genes was not analyzed or even mentioned in a previous  
332 publication. As expected, an enrichment of the FTC candidate genes (75) annotated within the FTC  
333 QTL regions was found. In several cases we identified more than one homologous sequence in the  
334 grapevine genome with a single copy *Arabidopsis* query. In these cases not necessarily the gene  
335 with the highest sequence similarity is the one in the FTC QTL region, nor the one with the highest  
336 expression in flowering related tissues. For instance the *RAV* genes *VvRAV1b* and *VvRAV1c* are  
337 located within the QTL regions on chr 1 and chr 14, respectively, whereas the *RAV1a* is located on  
338 chr 11 outside of any FTC QTL.  
339

340 Many of the FTC candidate genes are transcription factors involved in flower development and  
341 morphogenesis such as members of the AP2/EREBP family [46] and homeodomain proteins [47].  
342 About eight MYB-transcription factors that participate in cell cycle control in many living taxa [48]  
343 were among the identified FTC candidate genes in *Vitis*. Several other protein families were among  
344 the FTC candidate genes, such as a dozen GRAS and FRIGIDA proteins that are involved in  
345 flowering time and plant development. FRIGIDA proteins are required for the regulation of  
346 flowering time by upregulating *FLC* expression. Allelic variation at the FRIGIDA locus is an  
347 important determinant of natural variation in the timing of flowering [49]. The GRAS (GAI, RGA,  
348 SCR) family is a very important family of proteins involved in flowering in grapevine. GRAS  
349 proteins participate in GA signaling, which influences numerous aspects of plant growth and  
350 development [50]. Remarkably sixteen SQUAMOSA PROMOTER BINDING PROTEIN (SBP)-  
351 domain proteins, that are known from other plants as transcriptional activators involved in a variety  
352 of processes such as flower and fruit development, plant architecture, GA signaling, and the control  
353 of early flower development [51] are candidates.

## 354 **Allele phasing**

355 From our comprehensive list of *V. vinifera* FTC candidates the 72 most promising genes were  
356 chosen as targets for amplicon sequencing (S5 Table), many of which are located in flowering  
357 related QTL regions on chr 1, 14, and 17 [23]. The average read depth of coverage was 286 (SD:  
358 276) and for most samples sequencing depth was between 100 and 300. Variants in the analyzed

360 SNPs.

361 In order to link certain alleles of the sequenced candidate genes to the flowering time phenotype,  
362 the two alleles of genes had to be reconstructed from the mix of sequenced fragments of the two  
363 alleles. The phasing of alleles was performed on the basis of sites polymorphic between the two  
364 alleles of a gene.

365 Aside from recombination events, a parent-offspring pair must share one haplotype for each  
366 chromosome and thus one identical-by-descent allele for every gene. Hence, Mendelian constraints  
367 could be applied to validate the obtained allele-specific sequence. Alleles of the chosen 72 target  
368 genes studied could be identified in 46 cases (S5 Table).

369 In 23 cases four different allele sequences could be found, three allele sequences in 18 cases, two in  
370 four cases and in one case (VIT\_217s0000g00150; *VvFL*) only one allele sequence, meaning that all  
371 individuals of the population were homozygous for the respective locus. This fits the expectation  
372 since grapevine is highly heterozygous. The number of allele sequences has been deduced from  
373 regions of the genes in which phasing was performed. The lengths of the phased intervals were  
374 between 204 and 8,285 bp (S5 Table).

## 375 **Correlation analysis**

376 Allele sequences of the progeny of the mapping population GF.GA-47-42 x ‘Villard Blanc’ were  
377 compared against the allele sequences of the parental lines to determine the inheritance pattern  
378 within the population for each gene. In order to find alleles correlating with the phenotype of  
379 flowering time, a correlation analysis between the phased alleles of FTC target genes and flowering  
380 time phenotypes was performed. Several sets of phenotypic data were used. For the years 1999,  
381 2009 - 2016 a correlation analysis was performed using days after January 1<sup>st</sup> of the respective year.  
382 Additionally for the years 2011 - 2016 values of accumulated temperature above 3°C from  
383 November 1<sup>st</sup> of the previous year and global radiation in KWh/m<sup>2</sup> from January 1<sup>st</sup> were  
384 considered.

385 After the reconstruction of inheritance patterns within the parental lines and the 35 analyzed F<sub>1</sub>  
386 individuals of the mapping population GF.GA-47-42 x ‘Villard Blanc’ through the amplicon  
387 sequencing approach and subsequent bioinformatic analysis, the numbers of individuals harboring  
388 each of the alleles was determined and a correlation analysis between alleles of FTC target genes  
389 and the flowering time phenotype was performed for 43 genes. A correlation between alleles and

391 contigs. Correlation values differed depending on whether days, accumulated temperature or global  
392 radiation was used as phenotypic data. As an example Fig. 2 shows allele combinations in the  
393 parental lines of the population GF.GA-47-42 x ‘Villard Blanc’ and the p-values of the correlation  
394 of alleles unique to one of the lines. Values equal and below 0.05 were considered to be significant  
395 and the lower the p-value the higher is the correlation. In total for 16 FTC target gene alleles a  
396 significant correlation with either an early or late flowering phenotype could be found.

397 Fig 2: Correlation between alleles of FTC target genes and flowering time phenotype. Given are the  
398 allele constitutions of the parental lines for each gene and the allele counts of the amplicon  
399 sequenced F<sub>1</sub> individuals. The median of flowering time (calculated from days after January 1<sup>st</sup> of  
400 the years 1999 and 2010-2016) of individuals carrying the counted is given in brackets. The higher  
401 the value of the median, the later the flowering phenotype of the F<sub>1</sub> individuals. Color coded are the  
402 p-values for the E alleles and L alleles in the up to 35 F<sub>1</sub> individuals. Significant correlation values  
403 are in bold and italic. Genes located in QTL regions are marked in grey. Differences in allele counts  
404 between the years are due to missing data points. “E” alleles are inherited from GF.GA-47-42,  
405 while “L” alleles originate from ‘Villard Blanc’. “N” means that both GF.GA-47-42 and ‘Villard  
406 Blanc’ share one or more alleles. “E0”: E1=E2, “L0”: L1=L2, “N1”: E1=L1, “N2”: E2=L2. “N”:  
407 L2=E1 or E2=L1, “Na”: E1=E2=L1, “Nb”: E1=E2=L2. „n.d.“ : not determined. Further  
408 explanations are given in S3 Table.

409 The L2 alleles, inherited from the paternal line ‘Villard Blanc’, of *VvSEP4* (*SEPALLATA 4*), *VvBS2*,  
410 *VvHUA2a*, *VvRAV1b*, and *VvGAIL* (chr 1) correlate with late flowering, strengthen the importance  
411 of the FTC QTL on chr1. The E1 alleles of the two genes *VvWNK6* (*V. vinifera WITH NO LYSIN*  
412 *KINASE 6*) and *VvTM6* (*V. vinifera TOMATO MADS-BOX 6*), both located on chr 4 and inherited  
413 from the early flowering maternal line, were found to strongly correlate with early flowering. The  
414 p-values calculated from the median (Fig 2 is p = 0.007 and values down to p = 0.003 were  
415 observed for single years. Table 3 shows the p-values of correlation for different sets of phenotypic  
416 data related to *VvWNK6* and *VvTM6*. Most of the significant correlations are obvious regardless the  
417 year or scale of phenotyping (days after January 1<sup>st</sup>, accumulated temperature or global radiation).  
418 The differences in correlation among years are due to the seasonal weather conditions of the  
419 respective year, which influence both the flowering time and the length of the flowering period. A  
420 significant correlation between the E1 allele of *VvWNK6* and the flowering time phenotype could  
421 not be observed in 2016 for neither days after January 1<sup>st</sup>, accumulated temperature or global  
422 radiation. In 2015, the correlation was not significant for days after January 1<sup>st</sup> but, albeit only



423 bioRxiv preprint doi: <https://doi.org/10.1101/584268>; this version posted March 22, 2019. The copyright holder for this preprint (which was not certified by peer review) is the author/funder, who has granted bioRxiv a license to display the preprint in perpetuity. It is made available under aCC-BY 4.0 International license.

424 *MOTHER of FT and TFL1*) showed significant correlation in 2016 but not in 2013.

425 Table 3: P-values of the correlation between the E1 allele distribution of *VvWNK6* and *VvTM6* in  
426 relation to different sets of phenotypic data using 35 amplicon sequenced F<sub>1</sub> individuals.

427

|                                                           |       |       |
|-----------------------------------------------------------|-------|-------|
| Days after January 1 <sup>st</sup> / 1999                 | 0.032 | 0.023 |
| Days after January 1 <sup>st</sup> / 2009                 | 0.012 | 0.009 |
| Days after January 1 <sup>st</sup> / 2010                 | 0.44  | 0.37  |
| Days after January 1 <sup>st</sup> / 2011                 | 0.033 | 0.063 |
| Days after January 1 <sup>st</sup> / 2012                 | 0.047 | 0.041 |
| Days after January 1 <sup>st</sup> / 2013                 | 0.008 | 0.012 |
| Days after January 1 <sup>st</sup> / 2014                 | 0.015 | 0.029 |
| Days after January 1 <sup>st</sup> / 2015                 | 0.067 | 0.063 |
| Days after January 1 <sup>st</sup> / 2016                 | 0.177 | 0.098 |
| Median for days after January 1 <sup>st</sup> / 1999-2016 | 0.012 | 0.009 |
| Accumulated Temp. above 3°C/ 2011                         | 0.027 | 0.109 |
| Accumulated Temp. above 3°C/ 2012                         | 0.03  | 0.091 |
| Accumulated Temp. above 3°C/ 2013                         | 0.004 | 0.058 |
| Accumulated Temp. above 3°C/ 2014                         | 0.003 | 0.016 |
| Accumulated Temp. above 3°C/ 2015                         | 0.046 | 0.186 |
| Accumulated Temp. above 3°C/ 2016                         | 0.177 | 0.098 |
| Global radiation (KWh/m <sup>2</sup> )/ 2011              | 0.027 | 0.109 |
| Global radiation (KWh/m <sup>2</sup> )/ 2012              | 0.03  | 0.091 |
| Global radiation (KWh/m <sup>2</sup> )/ 2013              | 0.004 | 0.058 |
| Global radiation (KWh/m <sup>2</sup> )/ 2014              | 0.003 | 0.016 |
| Global radiation (KWh/m <sup>2</sup> )/ 2015              | 0.046 | 0.186 |
| Global radiation (KWh/m <sup>2</sup> )/ 2016              | 0.177 | 0.098 |

428

429 Compared to the reference sequence, the E1 allele of *VvWnk6* (chr 4) was found to harbor a  
 430 variation in the terminal exon (SNP at chr4:21997435/ C → T) leading to an amino acid exchange  
 431 from threonine to methionine. Fig. 3 shows the distribution of allele combinations for *VvWnk6*

433 inherited from the maternal ‘Bacchus’ allele of GF.GA-47-42.

434 Fig 3: Distribution of allele combinations for *VvWnk6* (chr 4) among 35 selected individuals of the  
435 mapping population GF.GA-47-42 x ‘Villard Blanc’. The date of flowering was counted in days  
436 from the 1<sup>st</sup> of January and the data was subsequently classified according to six stages for  
437 flowering time following (1 = very early flowering; 2 = early flowering; 3 = medium early  
438 flowering; 4 = medium late flowering; 5 = late flowering; 6 = very late flowering). For visualization  
439 flowering classes 1 and 2, 3 and 4, and 5 and 6 were merged.

## 440 **Application of the pipeline for amplicon sequencing in a heterozygous** 441 **plant for subsequent marker design**

442 Amplicon sequencing was performed in 35 F<sub>1</sub> individuals and the parents of the mapping  
443 population. In order to investigate the resulting allele distributions over all 151 F<sub>1</sub> individuals of the  
444 mapping population GF.GA-47-42 x ‘Villard Blanc’, STS markers were designed from the allele  
445 sequences that enabled an easy allele-specific genotyping. The information obtained from amplicon  
446 sequencing of the FTC target genes proved usable for both deduction of segregation patterns and  
447 marker design for investigating allele distribution over the whole mapping population. Table 4 gives  
448 an overview of the segregation patterns as analyzed for all 151 F<sub>1</sub> individuals. From 15 markers 12  
449 showed a segregation pattern matching the segregation pattern that was obtained through allele  
450 phasing. The markers GAVBInd\_019 and GAVBInd\_020 were not designed using the obtained  
451 allele sequences of GF.GA-47-42 and ‘Villard Blanc’, since suitable InDels were not available.  
452 Therefore, these markers were designed based on InDels upstream of the phased regions. Observed  
453 product sizes can deviate from the expected ones by 1 – 2 bp due to the limited accuracy of the used  
454 fragment analyzing method. Markers GAVBInd\_004, GAVBInd\_014, and GAVBInd\_019 showed  
455 two different segregation patterns since the measuring method cannot reliably resolve differences of  
456 1 – 2 bp. See S6 Table for further details.

457 Table 4: Comparison of the expected and observed allele sizes (bp) and segregation patterns of  
458 several FTC target genes. Expected data were obtained through amplicon sequencing; observed data  
459 were gained by analyzing 151 F<sub>1</sub> individuals of the mapping population GF.GA-47-42 x ‘Villard  
460 Blanc’ with STS markers located within the FTC target genes. ab x cd: four alleles/both parents  
461 heterozygous, hk x hk: 2 alleles/both parents heterozygous, ef x eg: 3 alleles/both parents  
462 heterozygous, lm x ll: 2 alleles/ mother heterozygous, nn x np: 2 alleles, father heterozygous. x:  
463 amplification failed. See Table S6 for further information.

| Gene            | Marker name | Expected product sizes |                 | Expected segregation | Observed product sizes |                 | Observed segregation |
|-----------------|-------------|------------------------|-----------------|----------------------|------------------------|-----------------|----------------------|
|                 |             | GF.GA-47-42            | 'Villard Blanc' |                      | GF.GA-47-42            | 'Villard Blanc' |                      |
| <i>VvHLH74</i>  | GAVBInd_009 | 147/155                | 155/155         | lmxll                | 137/146                | 146/146         | lmxll                |
| <i>VvBHLH74</i> | GAVBInd_010 | 230/233                | 234/230         | hkxhk                | 231/237                | 231/237         | hkxhk                |
| <i>VvHUA2</i>   | GAVBInd_001 | 452/455                | 437/456         | bbxcd                | 454/454                | 441/454         | nnxnp                |
| <i>VvCOL10</i>  | GAVBInd_004 | 197/195                | 197/196         | hkxhk                | 195/197                | 195/197         | hkxhk                |
| <i>VvCOL10</i>  | GAVBInd_004 | 197/195                | 197/196         | efxeg                | 194/196                | 195/196         | efxeg                |
| <i>VvCOL10</i>  | GAVBInd_005 | 146/115                | 155/155         | lmxll                | 110/142                | 110/110         | lmxll                |
| <i>VvWNK6</i>   | GAVBInd_019 | N/A                    | N/A             | N/A                  | 210/x                  | 217/218         | abxcd                |
| <i>VvWNK6</i>   | GAVBInd_019 | N/A                    | N/A             | N/A                  | 210/x                  | X               | lmxll                |
| <i>VvFPA</i>    | GAVBInd_007 | 362/353                | 363/365         | efxeg                | 363/x                  | X               | lmxll                |
| <i>VvGAMYBc</i> | GAVBInd_014 | 401/422                | 435/426         | abxcd                | 407/428                | 432/437         | abxcd                |
| <i>VvGAMYBc</i> | GAVBInd_014 | 401/422                | 435/426         | abxcd                | 457/x                  | X               | lmxll                |
| <i>VvCOL5</i>   | GAVBInd_015 | 309/312                | 312/312         | lmxll                | 195/198                | 198/198         | lmxll                |
| <i>VvTOE3</i>   | GAVBInd_016 | 276/275                | 268/275         | efxeg                | 279/282                | 272/279         | efxeg                |
| <i>VvTOE3</i>   | GAVBInd_017 | 139/144                | 144/144         | lmxll                | 136/140                | 140/1740        | lmxll                |
| <i>VvPRR37b</i> | GAVBInd_018 | 281/286                | 286/286         | lmxll                | 281/286                | 286/286         | lmxll                |
| <i>VvGAIb</i>   | GAVBInd_006 | 231/241                | 231/236         | efxeg                | 231/245                | 231/237         | efxeg                |
| <i>VvFLKa</i>   | GAVBInd_012 | 133/182                | 182/182         | lmxll                | 128/178                | 178/178         | lmxll                |
| <i>VvFLKa</i>   | GAVBInd_013 | 213/217                | 213/213         | abxcd                | 211/215                | 211/215         | hkxhk                |
| <i>VvFUL2</i>   | GAVBInd_020 | N/A                    | N/A             | N/A                  | 443/433                | 414/444         | abxcd                |
| <i>VvSVP2</i>   | GAVBInd_008 | 236/247                | 248/248         | lmxll                | 238/244                | X               | lmxll                |

464

465 Using the results of marker segregation across the 151 F<sub>1</sub> individuals, a correlation analysis between  
 466 alleles and flowering time phenotypes was performed. The correlation results of marker analysis  
 467 support those of allele phasing (Table 5). See S7 Table for further details.

468 Table 5: P-values of correlation between alleles and the phenotype of flowering time from both the  
 469 allele phasing workflow (first row) and marker analysis (second row) based on days after January  
 470 1<sup>st</sup> on the median of the years 1999 and 2009-2016. Marker analysis was performed in 151 F<sub>1</sub>  
 471 individuals of the population GF.GA-47-42 x 'Villard Blanc', while allele phasing was performed  
 472 in 35 F<sub>1</sub> individuals. Number of alleles over the analyzed F<sub>1</sub> individuals and the median of each, are  
 473 given in the same order as in column 3. ab x cd: four alleles/both parents heterozygous, ef x eg: 3  
 474 alleles/both parents heterozygous, lm x ll: 2 alleles/ mother heterozygous, nn x np: 2 alleles, father  
 475 heterozygous.

| Gene            | Marker name | GF.GA-47-42 x 'Villard Blanc'       | Segregation                    |                 | Allele numbers |                 |             |                 | Median      |                 |       |       |
|-----------------|-------------|-------------------------------------|--------------------------------|-----------------|----------------|-----------------|-------------|-----------------|-------------|-----------------|-------|-------|
|                 |             |                                     | between alleles and phenotypes |                 |                |                 |             |                 |             |                 |       |       |
|                 |             |                                     | GF.GA-47-42                    | 'Villard Blanc' | GF.GA-47-42    | 'Villard Blanc' | GF.GA-47-42 | 'Villard Blanc' | GF.GA-47-42 | 'Villard Blanc' |       |       |
| <i>VvbHLH49</i> |             | E1E2 x L1L2                         | 0.438                          | 0.77            | 13             | 14              | 12          | 15              | 0.48        | 0.62            | 0.56  | 0.48  |
|                 | GAVBInd_009 | lm x ll (m = E1)                    | 0.32                           | /               | 64             | 67              | /           | /               | 0.48        | 0.5             | /     | /     |
| <i>VvHUA2</i>   |             | E1E2 x L1L2                         | 0.076                          | 0.04            | 14             | 12              | 11          | 15              | 0.41        | 0.665           | 0.41  | 0.66  |
|                 | GAVBInd_001 | nn x np (p = L1)                    | /                              | 0.02            | /              | /               | 67          | 65              | /           | /               | 0.47  | 0.51  |
| <i>VvCOL10</i>  |             | E1E2 x L1L2                         | 0.018                          | 0.097           | 12             | 15              | 12          | 15              | 0.41        | 0.67            | 0.48  | 0.66  |
|                 | GAVBInd_005 | lm x ll (m = E2)                    | 0.295                          |                 | 66             | 68              | /           | /               | 0.46        | 0.505           | /     | /     |
|                 | GAVBInd_004 | ef x eg (f=E2, g=L2)                | 0.4                            | 0.39            | 54             | 75              | 68          | 61              | 0.48        | 0.5             | 0.5   | 0.5   |
| <i>VvWNK6</i>   |             | E1N2 x L1N2                         | 0.007                          | 0.703           | 25             | 10              | 19          | 16              | 0.55        | 0.725           | 0.61  | 0.575 |
|                 | GAVBInd_019 | ab x cd                             | 0                              | 0.573           | 81             | 67              | 66          | 82              | 0.45        | 0.54            | 0.475 | 0.5   |
|                 | GAVBInd_019 | lm x ll                             | 0                              | /               | 81             | 67              | /           | /               | 0.45        | 0.54            | /     | /     |
| <i>VvFPA</i>    |             | E1E2 x L1L2                         | 0.536                          | 0.257           | 7              | 28              | 20          | 15              | 0.55        | 0.6             | 0.6   | 0.55  |
|                 | GAVBInd_007 | lm x ll (m = E2)                    | 0.7                            | /               | 53             | 79              | /           | /               | 0.48        | 0.5             | /     | /     |
| <i>VvGAMYBc</i> |             | E1E2 x L1L2                         | 0.691                          | 0.68            | 16             | 19              | 27          | 8               | 0.57        | 0.61            | 0.6   | 0.625 |
|                 | GAVBInd_014 | ab x cd (a = E1, b=E2, c= L1, d L2) | 0.45                           | 0.79            | 70             | 59              | 96          | 33              | 0.5         | 0.5             | 0.5   | 0.46  |
| <i>VvCOL5</i>   |             | E1E2 x L1L2                         | 0.445                          | 0.567           | 15             | 19              | 19          | 15              | 0.66        | 0.6             | 0.59  | 0.6   |
|                 | GAVBInd_015 | lm x ll (m = E2)                    | 0.81                           | /               | 67             | 64              | /           | /               | 0.48        | 0.5             | /     | /     |
| <i>VvTOE3</i>   |             | E1E2 x L1L2                         | 0.231                          | 0.943           | 19             | 15              | 12          | 22              | 0.56        | 0.61            | 0.605 | 0.57  |

|                 |             |                            |       |       |    |    |    |    |       |      |      |      |
|-----------------|-------------|----------------------------|-------|-------|----|----|----|----|-------|------|------|------|
|                 | GAVBInd_016 | (f=E2,<br>g=L2)            | 0.23  | 0.85  | 69 | 66 | 68 | 67 | 0.5   | 0.49 | 0.5  | 0.5  |
|                 | GAVBInd_017 | lm x ll (m =<br>E2)        | 0.13  | /     | 71 | 65 | /  | /  | 0.5   | 0.48 | /    | /    |
| <b>VvPRR37b</b> |             | E1E2 x<br>L1L2             | 0.73  | 0.431 | 14 | 14 | 9  | 19 | 0.595 | 0.61 | 0.6  | 0.59 |
|                 | GAVBInd_018 | lm x ll (m =<br>E1)        | 0.88  | /     | 67 | 66 | /  | /  | 0.48  | 0.5  | /    | /    |
| <b>VvGAIb</b>   |             | E1E2 x<br>L1L2             | 0.027 | 0.059 | 12 | 16 | 13 | 15 | 0.665 | 0.41 | 0.69 | 0.46 |
|                 | GAVBInd_006 | ef x eg<br>(f=E1,<br>g=L2) | 0     | 0.25  | 80 | 55 | 70 | 65 | 0.45  | 0.58 | 0.48 | 0.51 |
| <b>VvFLKa</b>   |             | E1E2 x<br>L1L2             | 0.069 | 0.392 | 7  | 19 | 15 | 11 | 0.67  | 0.49 | 0.6  | 0.55 |
|                 | GAVBInd_012 | lm x ll (m =<br>E2)        | 0.01  | /     | 79 | 59 | /  | /  | 0.46  | 0.56 | /    | /    |
| <b>VvFUL2</b>   |             | E1E2 x<br>L0L0             | 0.003 | /     | 12 | 13 | /  | /  | 0.725 | 0.41 | /    | /    |
|                 | GAVBInd_020 | Abxcd                      | 0     | 0.93  | 58 | 89 | 67 | 80 | 0.575 | 0.44 | 0.5  | 0.49 |
| <b>VvSVP2</b>   |             | E1E2 x<br>L1L2             | 0.05  | 0.064 | 17 | 17 | 15 | 19 | 0.49  | 0.6  | 0.41 | 0.61 |
|                 | GAVBInd_008 | lm x ll (m =<br>E2)        | 0.86  | /     | 62 | 66 | /  | /  | 0.48  | 0.5  | /    | /    |

476

## 477 Analysis of gene expression kinetics

478 Variation in expression could be detected in both time courses 2012/2013 and 2013/2014 for  
 479 various FTC candidate and target genes when testing for time-specific effects. Between consecutive  
 480 developmental stages of bud differentiation before dormancy (August 2<sup>nd</sup> to September 5<sup>th</sup>, 2013  
 481 time series 1, Table 2) differences in expression could be detected for the MADS transcription  
 482 factor *VvTM8* as well as the protein kinase encoding gene *VvWNK5*. *VvTM8* encodes a MIKC  
 483 transcription factor whose *A. thaliana* homologue *AtTM8* has been shown to be involved in the  
 484 specification of flower organ identity [25].

485 In a time course of dormant buds (BBCH 0) until after bud burst when leaf formation had already  
 486 begun (BBCH 11-13), 58 of the FTC candidate genes were found to show a BBCH or  
 487 developmental stage-dependent expression. Several of these genes are squamosa binding proteins,

489 these genes show a variation in gene expression due to an up or down regulation towards  
490 developmental stages during inflorescence maturation. In order to test for expression variation  
491 between consecutive developmental stages of bud development before inflorescence structures  
492 become externally visible, inflorescences collected after bud break were excluded from the analysis.  
493 Genes with different expression kinetics when the time course was extended to include visible  
494 inflorescences, are those showing a clear variation in gene expression between buds and  
495 inflorescence. In total 67 of such “inflorescence-specific genes” were identified (S8 Table).

496 After excluding inflorescences, several genes were found showing an obvious time-dependent  
497 expression. They cluster into two groups: genes upregulated in winter during bud dormancy (Fig 4,  
498 upper part) and genes upregulated towards inflorescence development (Fig 4, lower part). Most of  
499 these genes encode BZIP-, MADS- or MYC-transcription factors, which regulate other flowering  
500 related genes. Downregulation towards bud burst and inflorescence maturation was found for  
501 transcription factor genes involved in circadian rhythm such as *VvGRP2A* (*Glycine Rich Protein*  
502 *2A*), *VvRVE1* (*REVEILLE*), *VvTICb* (*TIME FOR COFFEE*) and *VvELF3* (*EARLY FLOWERING3*).  
503 Moreover, genes coding for transcription factors involved in gibberellic acid (GA) biosynthesis  
504 were found to be upregulated during bud dormancy. Numerous other genes like *VvHUA2b*  
505 (*ENHANCER OF AGAMOUS*), which is involved in the repression of floral transition and flower  
506 development, were found to be upregulated during bud dormancy.

507 Fig 4: Heatmap of FTC candidate genes showing variations in their expression over consecutive  
508 time points of bud development from dormancy until appearance of inflorescence in grapevine  
509 variety GF.GA-47-42. Time series from December 20<sup>th</sup>, 2012 to May 3<sup>rd</sup>, 2013. LFC-threshold: 2 =  
510 expression fourfolded, -2 = expression quartered. Shown are rlog transformed counts.

511 For most of the genes (Fig 4) an up- or downregulation in expression is observed between the first  
512 and the second time point during bud dormancy. Many genes also show an up- or downregulation in  
513 expression between the third and the fourth time point when swelling buds are developing.

514 The gene expression for the amplicon sequenced target genes in buds and inflorescences is shown  
515 in Fig 5. Some genes are not expressed at all, while some are only expressed before dormancy or in  
516 inflorescence tissue. However, up- or downregulation in gene expression mainly occurs when  
517 swelling buds develop. Genes involved in floral development, such as *VvSEP3* and *4*, *VvAPI*, and  
518 *VvTM6* show an increased expression in developing inflorescences. *VvTM6* is a MADS-box B-class  
519 floral identity gene influencing the development of petals and stamen [52,53]. In *Vitis* all three B-

521 Figure).

522 Fig 5: Heatmap of gene expression of amplicon sequenced FTC candidate genes in GF.GA-47-42 at  
523 different developmental stages of buds and inflorescences. LFC-threshold: 1 = expression doubled,  
524 -1 = expression halved. rlog transformed counts are shown.

525 For three selected time points, bud/inflorescence samples and the corresponding leaf from the same  
526 node were collected and differential gene expression was analyzed between leaves and the  
527 associated bud/inflorescence. Fig 6 shows a heatmap of the FTC candidate genes with expression  
528 differences between the leaves and buds/inflorescences. With few exceptions, all genes with expression  
529 differences between leaves and buds or inflorescences are downregulated or not expressed in leaves.

530 Fig 6: Heatmap of FTC candidate genes showing expression variations between leaves and their  
531 prompt buds/ inflorescences. LFC-threshold: 2 = expression fourfolded, -2 = expression quartered.  
532 Shown are rlog transformed counts.

## 533 Discussion

### 534 FTC candidate genes

535 A large number of FTC candidate genes inside and outside of known flowering QTLs in grapevine  
536 were identified. Although the identification relies mostly on sequence homology to previously  
537 known genes from other plants, the putative functional connection via e.g. Pfam, literature search or  
538 the performed RNA-Seq experiments substantiate the reliability of the prediction. This  
539 comprehensive gene list opens the door for investigations on e.g. flowering time networks in the  
540 future. On the one hand, compared to *Arabidopsis thaliana* there is probably an overestimation of  
541 FTC candidate genes in *Vitis*. On the other hand the high complexity and long duration of bud  
542 initiation and flower development may require a large number of genes.

### 543 Allele phasing of target genes

544 A workflow for the phasing of amplicon sequenced genes using Illumina short-read sequencing of  
545 a diploid organism was established and successfully applied to separate alleles in regions with a  
546 length of up to 8.3 kb. By analyzing inheritance patterns within a family of parents and F<sub>1</sub>  
547 individuals, we could show that the inheritance of alleles of neighboring genes within a QTL  
548 remains largely constant throughout the QTL. Since grapevine has a highly heterozygous genome



550 pseudo-testcross strategy [54]. Therefore, a lower recombination frequency was expected compared  
551 to typical F<sub>2</sub> mapping populations in other plant species. The constancy of the inheritance pattern of  
552 alleles of closely neighboring genes indicates the functionality and applicability of the established  
553 allele phasing method.

554 For the phasing of alleles, a mapped read or read pair needs to encompass two or more  
555 heterozygous sequence positions. The phase of the heterozygous sequence positions can be  
556 determined since each read or pair of reads is obtained from a single haplotype. Read lengths after  
557 trimming was distributed between 80 and 300 bp with an average insert size of ~500 bp. When  
558 variants were located farther apart than the maximum length that could be spanned by a read pair,  
559 alleles could not be phased despite the presence of variants. Moreover, the allele frequency,  
560 calculated from the read coverage of variants can vary despite being amplified from the same allele.  
561 The amount of reads covering a variant can differ from one variant to the next. When dealing with  
562 extremely biased allele frequencies, this can lead to some variants being detected while others  
563 remain undetected. In such cases allele phasing was unsuccessful. Some amplicons could hardly be  
564 amplified at all. This is likely due to a high diversity at the primer binding sites between the  
565 reference sequence and the plant lines analyzed in this work.

566 The use of paired-end sequencing is highly advantageous in haplotype phasing as it covers variants  
567 that are spaced at distances longer than the technology's read length limit. Read length in high-  
568 throughput sequencing is constantly increasing and technologies are evolving rapidly. With the rise  
569 of third generation technologies, capable of producing even longer reads, many of the difficulties  
570 associated with haplotype phasing might soon be alleviated as such data may permit direct phasing  
571 from sequence reads [26].

## 572 **Correlation analysis**

573 We were able to detect a correlation between alleles of FTC target genes and flowering time for  
574 several QTL regions, which supports the role of these regions in the timing of flowering. Flowering  
575 time is highly dependent on the weather conditions of the respective and previous year. Therefore,  
576 correlation values vary between the years, as observed e.g., for VvW<sup>NK6</sup> in 2016 (Table 3).

577 Alleles of FTC target genes within a QTL region on chr 1 were found to rather correlate with late,  
578 while QTL regions on chr 4 and 14 were found to correlate with early flowering. With one  
579 exception, all analyzed F<sub>1</sub> individuals carrying alleles correlating with flowering time from two of

581 very early flowering. The correlation for the QTL regions on chr 4 and 14 was more stable than for  
582 chr 1 indicating a stronger affect of these QTLs in the timing of flowering. The investigation of  
583 epistatic effects between these QTL regions could contribute to the clarification of the genetic  
584 factors that influence and control flowering time in grapevine.

585 Correlation values between alleles of FTC target genes and flowering time phenotypes could be  
586 largely supported by genetic marker analysis. Deviations can be due to the measuring method that  
587 can occasionally lead to deviations of up to two bp in product size. In order to distinguish the  
588 maximum putative number of alleles at a single locus within a bi-parental F<sub>1</sub> population of a diploid  
589 organism, the marker needs to be capable of distinguishing between four different alleles.

590 Classic high informative marker analysis requires InDels / SSRs that distinguish between the  
591 maximum number of different alleles with polymorphic differences of at least two bp in size at a  
592 specific locus. The usage of blocks of tightly linked polymorphisms and treating each haplotype of  
593 these blocks as a separate allele can produce highly polymorphic markers. In addition, it also uses  
594 SNPs and InDels shorter than two bp to distinguish between the alleles. This leads to a higher  
595 resolution compared to classic marker analysis and the detection of a higher number of different  
596 alleles.

597 The correlation of alleles of FTC genes with flowering time phenotypes is based on the genotypic  
598 data on one hand, which is obtained through the allele phasing workflow, from amplicon  
599 sequencing, mapping and variant calling to the final establishment of allele sequences. On the other  
600 hand, the correlation analysis is based on the phenotypic data, which is also prone to errors.  
601 Phenotyping of flowering time was performed on a daily basis throughout the flowering phase.  
602 Differences in the timing of flowering shorter than one day are therefore not recorded. Moreover,  
603 phenotyping is a subjective process when different people work on the recording of phenotypic data  
604 and hence a possible error source.

605 As already mentioned, the timing of flowering depends clearly on environmental parameters,  
606 especially weather and climatic conditions. These are most probably non-genetic factors causing the  
607 differences in the flowering periods between the respective years. In 2016, for example, flowering  
608 in the population GF.GA-47-42 x 'Villard Blanc' started on June 17<sup>th</sup> being very late compared to  
609 other years (Table 2). However, the flowering period was very short, ending after only 10 days on  
610 June 26<sup>th</sup>. Global radiation is distributed between ~502 and ~536 KWh/m<sup>2</sup> at the beginning of  
611 flowering in the analyzed population and between ~548 and ~597 KWh/m<sup>2</sup> at the end of it. While

612 flowering occurred very late in 2016 compared to other years, the amount of global radiation until  
613 the first day of the flowering period was less than in the other years. This shows that the amount of  
614 solar radiation before flowering initiation was small which might have had an impact on the timing  
615 of flowering.

616 In some cases the p-value of correlation is significant although the medians are nearly equal or  
617 equal. This is because the Wilcoxon Rank-Sum test is a rank sum tests and not a median test. It  
618 ranks all of the observations from both groups and then sums the ranks from one of the groups and  
619 compares it with the expected rank sum. Therefore, it is in rare cases for groups possible to have  
620 different rank sums and yet have equal or nearly equal medians.

621 *VvHUA2a* of which an amplicon sequenced allele from ‘Villard Blanc’ was found to correlate with  
622 late flowering is a floral homeotic gene. It’s homologue in *A. thaliana*, *HUA2*, regulates the  
623 expression of the floral homeotic class-C gene *AGAMOUS (AG)* and *FLC* [55]. This suggests a role  
624 of *VvHUA2* in the delay of flowering.

625 An allele of *VvGAIL* from late flowering ‘Villard Blanc’ was found to correlate with late flowering.  
626 Mutants of *VvGAIL* are insensitive to gibberellic acid and form inflorescences instead of tendrils.  
627 These mutants show a correlation between inflorescence development and increased *VvFL*  
628 expression, a floral developmental gene [56]. In *A. thaliana*, *GAI* acts as a repressor of *LFY* and  
629 *SOCI* and thus represses flowering.

630

631 From the amplicon sequenced and early flowering individuals (median data) of the population  
632 GF.GA-47-42 x ‘Villard Blanc’, 90% were found to carry the *VvTM6* E1 allele inherited from  
633 GF.GA-47-42. Only 10% of plants that carry the other maternal allele are early flowering. *VvTM6* is  
634 a MADS-box B-class floral identity gene and influences the development of petals and stamen. In  
635 *A. thaliana*, mutants exhibit a transformation of petals to sepals and stamen to carpels. B-class floral  
636 homeotic genes either belong to the paleoAPETALA3 or to the PISTILLATA (PI) gene lineage,  
637 which are paralogous and resulted from a duplication event before the emergence of angiosperms.  
638 The paleoAP3 lineage underwent a further duplication event at the base of the core eudicots  
639 resulting in the two sublineages *euAP3* and *TM6* (named after the Tomato MADS-box gene 6) [57].  
640 A *TM6* homologue is absent in *A. thaliana* [52,57,58]. In grapevine, all three B-class floral  
641 homeotic genes were found to be highly expressed in inflorescences (Fig 5) but not in leaves (Fig  
642 6). [25] showed that *VvTM6 (VvAP3.2)* is expressed in fruits, while the expression of *VvAP3*

644 is higher in carpels, fruits, and seeds than in petals. Due to the expression of *VvTM6* in carpels and  
645 during berry development and ripening, it was suggested to play an important role in grapevine fruit  
646 development [25]. The expression of *VvTM6* increases towards inflorescence maturation, which is  
647 followed by berry formation and ripening. This is consistent with its role during berry development  
648 and ripening.

649 All early flowering amplicon sequenced individuals of the population GF.GA-47-42 x ‘Villard  
650 Blanc’ were observed to carry the E1 allele of *VvWnk6* (Fig 3). In *A. thaliana* *Wnk6* has been  
651 shown to be involved in circadian rhythm [59]. WNKs are a subfamily of serine/threonine protein  
652 kinases with a lysine residue essential for ATP-binding, which is located in kinase subdomain I  
653 instead of subdomain II as common among all other kinases [60]. It has been suggested that *Wnk*  
654 gene family members regulate flowering time in *A. thaliana* by modulating the photoperiod  
655 pathway. For instance, *APRR3*, a component of the clock-associated *APRR1/TOC1* quintet is a  
656 substrate of *Wnk1* in *A. thaliana*. T-DNA knockout mutants of *AtWnk1* are delayed in flowering  
657 time while T-DNA knockout mutants of *AtWnk2*, 5, and 8 flower early [61]. *Wnk6* transcription is  
658 downregulated in *AtABI4* mutants, which show an early flowering phenotype [62]. In *A. thaliana*,  
659 *ABI4* negatively regulates flowering through directly promoting *FLC* transcription, a negative  
660 regulator of flowering [63]. This might indicate that *VvWnk6* is involved in the delay of flowering.  
661 *VvWnk6* expression was detected in leaves, buds, and inflorescences of the early flowering  
662 GF.GA-47-42. Both alleles E1 and E2 are expressed at a similar level. However, all individuals of  
663 the mapping population carrying the E1 allele of *VvWnk6* flower early. This suggests that either the  
664 E1 allele of *VvWnk6* itself might contribute to early flowering or alleles of other nearby-genes  
665 inherited together with E1 of *VvWnk6*. Further analysis should include the investigation of  
666 sequence variations leading to an alteration of the amino acid sequence and the functionality of the  
667 protein.

## 668 **Gene expression kinetics**

669 Many of the analyzed FTC candidate genes show variations in expression pattern in the course of  
670 the developmental cycle, supporting their role in flowering time control. Genes coding for  
671 transcription factors and other proteins involved in inflorescence architecture, floral transition and  
672 flower development are usually upregulated after bud burst, while genes coding for proteins that  
673 repress flowering in diverse manners typically show an upregulation during bud dormancy (Fig 5).  
674 Among the genes showing downregulation towards bud burst and inflorescence maturation are  
675 transcription factors involved in circadian rhythm such as *VvGRP2A* (*Glycine Rich Protein 2A*),

677 not unexpected to detect different gene expression kinetics for genes involved in circadian rhythm  
678 since sampling was performed at the same time of the day over the entire time course. However, the  
679 period from daybreak until the time of sampling varies throughout the year and the different  
680 seasons.

681 *AtGRP7*, the homologue of *VvGRP2A* in *A. thaliana*, undergoes circadian oscillations with peak  
682 levels in the evening [64]. *RVE* is a MYB-like transcription factor that controls auxin levels,  
683 promotes free auxin and hence plant growth during the day [65]. *TIC* and *ELF3* are components of  
684 the circadian clock in *A. thaliana*. *ELF3* is a circadian clock gene that contributes to photoperiod-  
685 dependent flowering in plants [66-68]. Our findings thus suggest a similar impact of these genes in  
686 grapevine.

687 Moreover, genes coding for transcription factors involved in GA biosynthesis were found to be  
688 upregulated during bud dormancy. GAs are inhibitors of flowering in many fruit species but their  
689 role in grapevine varies with the stage of bud development. The initiation and development of  
690 lateral meristems is promoted by GAs as well as their development into tendrils, while  
691 inflorescence development is suppressed by GAs. Thus GA is a promoter of flowering at an early  
692 stage but acts as an inhibitor of flowering later on and promotes vegetative growth [19]. *SPY*  
693 (*SPINDLY*), whose *Vitis* homologue *VvSPY* was found to be upregulated during bud dormancy, is a  
694 negative regulator of GA response in *A. thaliana* and functions with *GI* (*GIGANTEA*) in pathways  
695 controlling flowering [69]. In *Vitis* the role of *SPY* in GA signaling is still unclear. It could be  
696 shown that treatment of grapevine plants at pre-bloom stage with GA led to rachis elongation and a  
697 downregulation of *VvSPY* in the rachis [70]. In *A. thaliana* GA signaling is initiated through its  
698 binding to the GA INSENSITIVE DWARF1 (GID1) receptors. This allows subsequent interaction  
699 between GID1 and DELLA proteins (GA INSENSITIVE [GAI], REPRESSOR OF GAI-3 [RGA],  
700 RGA-LIKE1 [RGL1], RGL2, and RGL3). DELLA proteins are transcriptional repressors and  
701 downregulate GA response genes. In the presence of gibberellin, the stable GID1-GA-DELLA  
702 complex is recognized by the SCF<sup>SLY1</sup> complex which ubiquitylates the DELLA proteins and  
703 causes their degradation by the 26S proteasome [71,72]. It has been reported previously that GID1-  
704 transcripts are upregulated during bud dormancy in grapevine while transcripts of DELLA are  
705 downregulated [73]. Similarly, we found that the GID1B receptor transcript is upregulated during  
706 bud dormancy while the DELLA-protein SLR1-like (SLENDER RICE 1 LIKE) are downregulated.  
707 This confirms the promoting role of GID1B in plant growth, and the development of lateral

709 suppression of inflorescence development through GA.

710 In our analyses, numerous other genes involved in the repression of floral transition and flower  
711 development were found to be upregulated during bud dormancy. *HUA2*-like genes, which play a  
712 role in the repression of floral transition [74], are upregulated during bud dormancy in *Vitis*. The  
713 *KNOTTED1*-like homeobox gene *BP* (*BREVIPEDICELLUS*) was found to be upregulated towards  
714 grapevine bud burst and inflorescence maturation. In *A. thaliana* *BP* controls distal pedicel growth  
715 and thus inflorescence architecture [75,76]. *ER* (*ERECTA*) and other *KNAT* (*KNOTTED-LIKE*)  
716 genes, are involved in inflorescence architecture in *A. thaliana* [77,78], were also found to be  
717 upregulated towards bud burst, which indicates their function in inflorescence development. Genes  
718 for *SQUAMOSA* promoter-binding proteins, known to be involved in flower development [79],  
719 were downregulated during bud dormancy while upregulated during flower formation in grapevine.  
720 The *BEL*-like gene (*VvBELa* and *b*) and the *Vitis* *STM* orthologue *VvSBH1* were also found to be  
721 upregulated during bud dormancy. *STM* and the *A. thaliana* homeobox-gene *BEL1* build a  
722 complex, which maintains the indeterminacy of the inflorescence meristem [80].

723 *MYC* transcription factors *VvbHLH74* and *VvbHLH63* show large variations in gene expression  
724 over time with a peak in expression around March when buds are swelling. *CIB1* (*cryptochrome-*  
725 *interacting basic-helix-loop-helix*), the *A. thaliana* homologue of *VvbHLH63*, plays a role in *CRY2*  
726 (*cryptochrome 2*)-dependent regulation of flowering time. Cryptochromes (*CRY*) are blue-light  
727 receptors that mediate light response. In yeast and *A. thaliana*, *CIB1* interacts with *CRY2* when  
728 blue light is available. It promotes *CRY2*-dependent floral initiation together with additional *CIB1*-  
729 related proteins and stimulates *FT* transcription [81]. Hence, *VvbHLH74* and *VvbHLH63* might be  
730 involved in light dependent floral initiation.

731 *ELF*-like genes as well as a *CONSTANS*-like gene (*VvCOL16*) and *CDF* genes (*CYCLING DOF*  
732 *FACTORS*) were upregulated during bud dormancy. *DOF* proteins delay flowering by repressing  
733 *CO* transcription [82]. *ELF3*, *ELF4*, and *TOC1* function in the primary, phytochrome-mediated  
734 light-input pathway to the circadian oscillator in *A. thaliana*. *TOC1* is necessary for light-induced  
735 *CCA1* (*CIRCADIAN CLOCK ASSOCIATED 1*)/ *LHY* (*LATE ELONGATED HYPOCOTYL*)  
736 expression [83]. Mutants of *elf4* show attenuated expression of *CCA1* and early flowering in non-  
737 inductive photoperiods, which is probably caused by elevated amounts of *CONSTANS* (*CO*), a gene  
738 that promotes floral induction [84]. *ELF4* is a flowering pathway gene that may play a key role in  
739 signaling processes regulating dormancy induction in grapevine [85].

741 suggested to have a role in bud development through an interaction with FLC in *A. thaliana* [85], is  
742 upregulated during bud dormancy in grapevine. *VvSPAR2* (*SUPPRESSOR OF PHYA RELATED2*)  
743 is upregulated during bud dormancy and downregulated towards inflorescence development. Its  
744 homologue in *A. thaliana* represses photomorphogenesis by negatively regulating the transcription  
745 factor *HY5* (*ELONGATED HYPOCOTYL 5*), which promotes photomorphogenesis [87,88].

## 746 Conclusion

747 Here, we have reported a new workflow for amplicon sequencing including allele phasing in the  
748 highly heterozygous species grapevine. Our genetic association study revealed a significant  
749 correlation between alleles of selected FTC target genes and flowering time phenotypes within and  
750 outside of previously mapped QTL regions for flowering time on chr 1, 4, 14, 17, and 18. The  
751 discovery of a correlation between alleles of FTC target genes and the timing of flowering for genes  
752 within previously defined QTL regions supports the role of these QTLs in the timing of flowering.  
753 The analysis of gene expression kinetics revealed strong changes in expression pattern for many  
754 FTC candidate genes over the consecutive developmental stages. A shift between an up- or  
755 downregulation in expression mostly occurred between dormant and swelling buds, or toward  
756 inflorescence maturation when the young inflorescence structures at the shoots grow out of the buds  
757 and become externally visible. These time-dependent expression profiles underline the role of many  
758 FTC candidate genes in the control of flowering time. Moreover, many FTC candidate genes were  
759 found to be expressed in buds and inflorescences but not in leaves. This tissue specificity further  
760 confirms their role in flowering time and floral development.

761 The knowledge of genes and loci that influence flowering time and play a role in early flowering  
762 may allow the selection of genotypes not carrying these alleles through grapevine breeding  
763 programs. To meet the expected change of climate conditions late flowering cultivars might be  
764 better adapted, especially in the present cool climate areas.

765 For future research, grapevine cultivars are to be analysed for alleles of flowering time control  
766 genes correlating with early or late flowering in order to further investigate the role of these alleles  
767 in the timing of flowering and study epistatic and additive effects between QTL regions influencing  
768 the timing of flowering.

## 769 Author contributions

770 N.K., L.H. and D.H. conceived and planned the experiments. N.K., I.O., A.S., P.V. designed and  
771 performed the experiments. I.O., L.H. and A.S. performed the phenotyping. N.K., I.O. and P.V.  
772 carried out the sample preparation. N.K., I.O. and L.H. calculated the data. R.T., B.W., D.H.

774 N.K. and D.H. wrote the manuscript with input from all authors.

## 775 Acknowledgements

776 We thank Willy Keller, Johanna Müschner, Thomas Rosleff Sørensen, and Andreas Preiss for the  
777 excellent technical support, and Martin Sagasser for editing the manuscript. In addition, the authors  
778 wish to thank the members of the SPP1530 team for their support. The research was funded by the  
779 German research foundation (DFG) - Project number 172418080/15 - SPP1530.

780

## 781 References

- 782 1. Carmona MJ, Chaïb J, Martínez-Zapater JM, Thomas MR (2008) A molecular genetic  
783 perspective of reproductive development in grapevine. *Journal of Experimental Botany* 59: 2579-  
784 2596.
- 785 2. Duchêne E, Butterlin G, Dumas V, Merdinoglu D (2012) Towards the adaptation of grapevine  
786 varieties to climate change: QTLs and candidate genes for developmental stages. *Theoretical and*  
787 *Applied Genetics* 124: 623-635.
- 788 3. Mullins MG, Bouquet A, Williams LE (1992) *Biology of the Grapevine*. Cambridge: Cambridge  
789 University Press.
- 790 4. Tomasi D, Jones GV, Giust M, Lovat L, Gaiotti F (2011) Grapevine Phenology and Climate  
791 Change: Relationships and Trends in the Veneto Region of Italy for 1964-2009. *American Journal*  
792 *of Enology and Viticulture* 62: 329-339.
- 793 5. Zyprian A, Eibach R, Trapp O, Schwander F, Töpfer R (2018) Grapevine breeding under climate  
794 change: Applicability of a molecular marker linked to veraison. *Vitis* 57: 119-123.
- 795 6. Rienth M, Torregrosa L, Sarah G, Ardisson M, Brillouet JM, et al. (2016) Temperature  
796 desynchronizes sugar and organic acid metabolism in ripening grapevine fruits and remodels their  
797 transcriptome. *BMC Plant Biology* 16: 164.
- 798 7. Boss PK, Buckeridge EJ, Poole A, Thomas MR (2003) New insights into grapevine flowering.  
799 *Functional Plant Biology* 30: 593-606.



801 *Reviews Genetics* 13: 627-639.

802 9. Ehrenreich IM, Hanzawa Y, Chou L, Roe JL, Kover PX, et al. (2009) Candidate gene association  
803 mapping of *Arabidopsis* flowering time. *Genetics* 183: 325-335.

804 10. Jaillon O, Aury JM, Noel B, Policriti A, Clepet C, et al. (2007) The grapevine genome sequence  
805 suggests ancestral hexaploidization in major angiosperm phyla. *Nature* 449: 463-467.

806 11. Velasco R, Zharkikh A, Troggio M, Cartwright DA, Cestaro A, et al. (2007) A high quality  
807 draft consensus sequence of the genome of a heterozygous grapevine variety. *PLoS One* 2.

808 12. Vitulo N, Forcato C, Carpinelli EC, Telatin A, Campagna D, et al. (2014) A deep survey of  
809 alternative splicing in grape reveals changes in the splicing machinery related to tissue, stress  
810 condition and genotype. *BMC Plant Biology* 14: 99.

811 13. Adam-Blondon A-F, Jaillon O, Vezzulli S, Zharkikh A, Troggio M, et al. (2011) Genome  
812 Sequence Initiatives. In: Adam-Blondon A-F, Martinez-Zapater JM, Kole C, editors. *Genetics,*  
813 *Genomics and Breeding of Grapes.*

814 14. Canaguier A, Grimplet J, Di Gaspero G, Scalabrin S, Duchêne E, et al. (2017) A new version of  
815 the grapevine reference genome assembly (12X.v2) and of its annotation (VCost.v3). *Genomics*  
816 *Data* 14: 56-62.

817 15. Carmo Vasconcelos M, Greven M, Winefield CS, Trought MCT, Raw V (2009) The Flowering  
818 Process of *Vitis vinifera*: A Review. *American Journal of Enology and Viticulture* 60: 411-434.

819 16. Calonje M, Cubas P, Martínez-Zapater JM, Carmona MJ (2004) Floral meristem identity genes  
820 are expressed during tendril development in grapevine. *Plant Physiology* 135: 1491-1501.

821 17. Joly D, Perrin M, Gertz C, Kronenberger J, Demangeat G, et al. (2004) Expression analysis of  
822 flowering genes from seedling-stage to vineyard life of grapevine cv. Riesling. *Plant Science* 166:  
823 1427-1436.

824 18. Sreekantan L, Thomas MR (2006) VvFT and VvMADS8, the grapevine homologues of the  
825 floral integrators FT and SOC1, have unique expression patterns in grapevine and hasten flowering  
826 in *Arabidopsis*. *Functional Plant Biology* 33: 1129-1139.

- 827 bioRxiv preprint doi: <https://doi.org/10.1101/584268>; this version posted March 22, 2019. The copyright holder for this preprint (which was not  
certified by peer review) is the author/funder, who has granted bioRxiv a license to display the preprint in perpetuity. It is made available under  
aCC-BY 4.0 International license.
- 828 grapevine (*Vitis vinifera* L.). *Canadian Journal of Botany* 85: 701-711.
- 829 20. Grattapaglia D, Sederoff R (1994) Genetic linkage maps of *Eucalyptus grandis* and *Eucalyptus*  
830 *urophylla* using a pseudo-testcross: mapping strategy and RAPD markers. *Genetics* 137: 1121-  
831 1137.
- 832 21. Cipriani G, Di Gaspero G, Canaguier A, Jusseaume J, Tassin J, et al. (2011) Molecular Linkage  
833 Maps: Strategies, Resources and Achievements. In: Adam-Blondon A-F, Martinez-Zapater JM,  
834 Kole C, editors. *Genetics, Genomics and Breeding of Grapes*.
- 835 22. Costantini L, Battilana J, Lamaj F, Fanizza G, Grando MS (2008) Berry and phenology-related  
836 traits in grapevine (*Vitis vinifera* L.): from quantitative trait loci to underlying genes. *BMC Plant*  
837 *Biology* 8.
- 838 23. Fechter I, Hausmann L, Zyprian E, Daum M, Holtgräwe D, et al. (2014) QTL analysis of  
839 flowering time and ripening traits suggests an impact of a genomic region on linkage group 1 in  
840 *Vitis*. *Theoretical and Applied Genetics* 127: 1857-1872.
- 841 24. Gökbayrak Z, Özer C, Söylemezoglu G (2006) Preliminary Results on Genome Mapping of an  
842 *Italia x Mercan* Grapevine Population. *Turk J Agric For* 30: 273-280.
- 843 25. Díaz-Riquelme J, Lijavetzky D, Martínez-Zapater JM, Carmona MJ (2009) Genome-wide  
844 analysis of MIKCC-type MADS box genes in grapevine. *Plant Physiology* 149: 354-369.
- 845 26. Aguiar D, Istrail S (2012) HapCompass: a fast cycle basis algorithm for accurate haplotype  
846 assembly of sequence data. *Journal of Computational Biology* 19: 577-590.
- 847 27. Browning SR, Browning BL (2011) Haplotype phasing: existing methods and new  
848 developments. *Nature Reviews Genetics* 12: 703-714.
- 849 28. Keurentjes JJ, Fu J, De Vos RCH, Lommen A, Hall RD, et al. (2006) The genetics of plant  
850 metabolism. *Nature Genetics* 38: 842-849.
- 851 29. Martin M, Patterson M, Garg S, Fischer SO, Pisanti N, et al. (2016) WhatsHap: fast and  
852 accurate read-based phasing. *Software*.
- 853 30. Bansal V, Bafna V (2008) HapCUT: an efficient and accurate algorithm for the haplotype  
854 assembly problem. *Bioinformatics* 24: 153-159.

856 Algorithms. ESA: 182-193.

857 32. Zyprian E, Ochßner I, Schwander F, Šimon S, Hausmann L, et al. (2016) Quantitative trait loci  
858 affecting pathogen resistance and ripening of grapevines. *Molecular Genetics and Genomics* 291:  
859 1573-1594.

860 33. Lorenz DH, Eichhorn KW, Bleiholder H, Klose R, Meier U, et al. (1995) Phenological growth  
861 stages of the grapevine (*Vitis vinifera* L. ssp. *vinifera*)-Codes and descriptions according to the  
862 extended BBCH scale. *Australian Journal of Grape and Wine Research* 1: 100-110.

863 34. Camacho C, Coulouris G, Avagyan V, Ma N, Papadopoulos J, et al. (2009) BLAST+:  
864 architecture and applications. *BMC Bioinformatics* 10: 421.

865 35. Ward N, Moreno-Hagelsieb G (2014) Quickly finding orthologs as reciprocal best hits with  
866 BLAT, LAST, and UBLAST: how much do we miss? *PLoS ONE* 9: e101850.

867 36. Untergasser A, Cutcutache I, Koressaar T, Ye J, Faircloth BC, et al. (2012) Primer3--new  
868 capabilities and interfaces. *Nucleic Acids Research* 40.

869 37. Bolger AM, Lohse M, Usadel B (2014) Trimmomatic: a flexible trimmer for Illumina sequence  
870 data. *Bioinformatics* 30: 2114-2120.

871 38. Li H, Durbin R (2009) Fast and accurate short read alignment with Burrows-Wheeler transform.  
872 *Bioinformatics* 25: 1754-1760.

873 39. Li H, Handsaker B, Wysoker A, Fennell T, Ruan J, et al. (2009) The Sequence Alignment/Map  
874 format and SAMtools. *Bioinformatics* 25: 2078-2079.

875 40. McKenna A, Hanna M, Banks E, Sivachenko A, Cibulskis K, et al. (2010) The Genome  
876 Analysis Toolkit: a MapReduce framework for analyzing next-generation DNA sequencing data.  
877 *Genome Research* 20: 1297-1303.

878 41. Van der Auwera GA, Carneiro MO, Hartl C, Poplin R, Del Angel G, et al. (2013) From FastQ  
879 data to high confidence variant calls: the Genome Analysis Toolkit best practices pipeline. *Current*  
880 *Protocols in Bioinformatics* 11: 1110.

882 variation discovery and genotyping using next-generation DNA sequencing data. *Nature Genetics*  
883 43: 491-498.

884 43. Kim D, Pertea G, Trapnell C, Pimentel H, Kelley R, et al. (2013) TopHat2: accurate alignment  
885 of transcriptomes in the presence of insertions, deletions and gene fusions. *Genome Biology* 14:  
886 R36.

887 44. Anders S, Pyl PT, Huber W (2015) HTSeq--a Python framework to work with high-throughput  
888 sequencing data. *Bioinformatics* 31: 166-169.

889 45. Love MI, Huber W, Anders S (2014) Moderated estimation of fold change and dispersion for  
890 RNA-seq data with DESeq2. *Genome Biology* 15: 550.

891 46. Riechmann JL, Meyerowitz EM (1998) The AP2/EREBP family of plant transcription factors.  
892 *Biological Chemistry* 379: 633-646.

893 47. Gehring WJ (1992) The homeobox in perspective. *Trends in Biochemical Sciences* 17: 277-280.

894 48. Stracke R, Werber M, Weisshaar B (2001) The R2R3-MYB gene family in *Arabidopsis*  
895 *thaliana*. *Current Opinion in Plant Biology* 4: 447-456.

896 49. Johanson U, West J, Lister C, Michaels S, Amasino R, et al. (2000) Molecular analysis of  
897 FRIGIDA, a major determinant of natural variation in *Arabidopsis* flowering time. *Science* 290:  
898 344-347.

899 50. Pysh LD, Wysocka-Diller JW, Camilleri C, Bouchez D, Benfey PN (1999) The GRAS gene  
900 family in *Arabidopsis*: sequence characterization and basic expression analysis of the  
901 SCARECROW-LIKE genes. *The Plant Journal* 18: 111-119.

902 51. Chen X, Zhang Z, Liu D, Zhang K, Li A, et al. (2010) SQUAMOSA promoter-binding protein-  
903 like transcription factors: star players for plant growth and development. *Journal of Integrative Plant*  
904 *Biology* 52: 946-951.

905 52. Poupin MJ, Federici F, Medina C, Matus JT, Timmermann T, et al. (2007) Isolation of the three  
906 grape sub-lineages of B-class MADS-box TM6, PISTILLATA and APETALA3 genes which are  
907 differentially expressed during flower and fruit development. *Gene* 404: 10-24.

- 909 box genes in plants. *Plant Molecular Biology* 42: 115-149.
- 910 54. Grattapaglia D, Bertolucci FL, Sederoff RR (1995) Genetic mapping of QTLs controlling  
911 vegetative propagation in *Eucalyptus grandis* and *E. urophylla* using a pseudo-testcross strategy and  
912 RAPD markers. *Theoretical and Applied Genetics* 90: 933-947.
- 913 55. Chen X, Meyerowitz, E M (1999) HUA1 and HUA2 are two members of the floral homeotic  
914 AGAMOUS pathway. *Molecular Cell* 3: 349-360.
- 915 56. Boss PK, Thomas MR (2002) Association of dwarfism and floral induction with a grape 'green  
916 revolution' mutation. *Nature* 416: 847-850.
- 917 57. Causier B, Castillo R, Xue Y, Schwarz-Sommer Z, Davies B (2010) Tracing the evolution of  
918 the floral homeotic B- and C-function genes through genome synteny. *Molecular Biology and*  
919 *Evolution* 27: 2651-2664.
- 920 58. Kramer EM, Dorit RL, Irish VF (1998) Molecular evolution of genes controlling petal and  
921 stamen development: duplication and divergence within the APETALA3 and PISTILLATA  
922 MADS-box gene lineages. *Genetics* 149: 765-783.
- 923 59. Nakamichi N, Murakami-Kojima M, Sato E, Kishi Y, Yamashino T, et al. (2002) Compilation  
924 and characterization of a novel WNK family of protein kinases in *Arabidopsis thaliana* with  
925 reference to circadian rhythms. *Bioscience, Biotechnology, and Biochemistry* 66: 2429-2436.
- 926 60. Hong-Hermesdorf A, Brück A, Grüber A, Grüber G, Schumacher K (2006) A WNK kinase binds  
927 and phosphorylates V-ATPase subunit C. *FEBS Letters* 580: 932-939.
- 928 61. Wang Y, Liu K, Liao H, Zhuang C, Ma H, et al. (2008) The plant WNK gene family and  
929 regulation of flowering time in *Arabidopsis*. *Plant Biology* 10: 548-562.
- 930 62. Foyer CH, Kerchev PI, Hancock RD (2012) The ABA-INSENSITIVE-4 (ABI4) transcription  
931 factor links redox, hormone and sugar signaling pathways. *Plant Signaling & Behavior* 7: 276-281.
- 932 63. Shu K, Chen Q, Wu Y, Liu R, Zhang H, et al. (2016) ABSCISIC ACID-INSENSITIVE 4  
933 negatively regulates flowering through directly promoting *Arabidopsis* FLOWERING LOCUS C  
934 transcription. *Journal of Experimental Botany* 67: 195-205.

- 935 64. Heitzler C, Natter M, Apel K, Staiger D (1997) AtCBP7, a nuclear RNA-binding protein as a  
936 component of a circadian-regulated negative feedback loop in *Arabidopsis thaliana*. Proceedings of  
937 the National Academy of Sciences of the United States of America 94: 8515-8520.
- 938 65. Rawat R, Schwartz J, Jones MA, Sairanen I, Cheng Y, et al. (2009) REVEILLE1, a Myb-like  
939 transcription factor, integrates the circadian clock and auxin pathways. Proceedings of the National  
940 Academy of Sciences of the United States of America 106: 16883-16888.
- 941 66. Boden SA, Weiss D, Ross JJ, Davies NW, Trevaskis B, et al. (2014) EARLY FLOWERING3  
942 Regulates Flowering in Spring Barley by Mediating Gibberellin Production and FLOWERING  
943 LOCUS T Expression. The Plant Cell 26: 1557-1569.
- 944 67. Hall A, Bastow RM, Davis SJ, Hanano S, McWatters HG, et al. (2003) The TIME FOR  
945 COFFEE gene maintains the amplitude and timing of *Arabidopsis* circadian clocks. The Plant Cell  
946 15: 2719-2729.
- 947 68. Ding Z, Millar AJ, Davis AM, Davis SJ (2007) TIME FOR COFFEE encodes a nuclear  
948 regulator in the *Arabidopsis thaliana* circadian clock. The Plant Cell 19: 1522-1536.
- 949 69. Tseng TS, Salomé PA, McClung CR, Olszewski NE (2004) SPINDLY and GIGANTEA  
950 interact and act in *Arabidopsis thaliana* pathways involved in light responses, flowering, and  
951 rhythms in cotyledon movements. The Plant Cell 16: 1550-1563.
- 952 70. Upadhyay A, Jogaiah S, Maske SR, Kadoo NY, Gupta VS (2015) Expression of stable reference  
953 genes and SPINDLY gene in response to gibberellic acid application at different stages of grapevine  
954 development. *Biologia Plantarum* 59: 436-444.
- 955 71. Cheng C, Jiao C, Singer SD, Gao M, Xu X, et al. (2015) Gibberellin-induced changes in the  
956 transcriptome of grapevine (*Vitis labrusca* × *V. vinifera*) cv. Kyoho flowers. *BMC Genomics* 16.
- 957 72. Fleet CM, Sun TP (2005) A DELLAcate balance: the role of gibberellin in plant morphogenesis.  
958 *Current Opinion in Plant Biology* 8: 77-85.
- 959 73. Khalil-Ur-Rehman M, Sun L, Li CX, Faheem M, Wang W, et al. (2017) Comparative RNA-seq  
960 based transcriptomic analysis of bud dormancy in grape. *BMC Plant Biology* 17: 18.
- 961 74. Doyle MR, Bizzell CM, Keller MR, Michaels SD, Song J, et al. (2005) HUA2 is required for  
962 the expression of floral repressors in *Arabidopsis thaliana*. *The Plant Journal* 41: 376-385.

964 vascular positioning and the role of the BREVIPEDICELLUS and ERECTA genes. *Developmental*  
965 *Biology* 284: 451-463.

966 76. Venglat SP, Dumonceaux T, Rozwadowski K, Parnell L, Babic V, et al. (2002) The homeobox  
967 gene BREVIPEDICELLUS is a key regulator of inflorescence architecture in Arabidopsis.  
968 *Proceedings of the National Academy of Sciences of the United States of America* 99: 4730-4735.

969 77. Douglas SJ, Chuck G, Dengler RE, Pelecanda L, Riggs CD (2002) KNAT1 and ERECTA  
970 Regulate Inflorescence Architecture in Arabidopsis. *The Plant Cell* 14: 547-558.

971 78. Shpak ED, Berthiaume CT, Hill EJ, Torii KU (2004) Synergistic interaction of three ERECTA-  
972 family receptor-like kinases controls Arabidopsis organ growth and flower development by  
973 promoting cell proliferation. *Development* 131: 1491-1501.

974 79. Yamasaki K, Kigawa T, Inoue M, Yamasaki T, Yabuki T, et al. (2006) An Arabidopsis SBP-  
975 domain fragment with a disrupted C-terminal zinc-binding site retains its tertiary structure. *FEBS*  
976 *Letters* 580: 2109-2116.

977 80. Bellaoui M, Pidkowich MS, Samach A, Kushalappa K, Kohalmi SE, et al. (2001) The  
978 Arabidopsis BELL1 and KNOX TALE homeodomain proteins interact through a domain conserved  
979 between plants and animals. *The Plant Cell* 13: 2455-2470.

980 81. Liu H, Yu X, Li K, Klejnot J, Yang H, et al. (2008) Photoexcited CRY2 interacts with CIB1 to  
981 regulate transcription and floral initiation in Arabidopsis. *Science* 322: 1535-1539.

982 82. Fornara F, Panigrahi KC, Gissot L, Sauerbrunn N, Rühl M, et al. (2009) Arabidopsis DOF  
983 transcription factors act redundantly to reduce CONSTANS expression and are essential for a  
984 photoperiodic flowering response. *Developmental Cell* 17: 75-86.

985 83. Doyle MR, Davis SJ, Bastow RM, McWatters HG, Kozma-Bognár L, et al. (2002) The ELF4  
986 gene controls circadian rhythms and flowering time in Arabidopsis thaliana. *Nature* 419: 74-77.

987 84. Kikis EA, Khanna R, Quail PH (2005) ELF4 is a phytochrome-regulated component of a  
988 negative-feedback loop involving the central oscillator components CCA1 and LHY. *The Plant*  
989 *Journal* 44: 300-313.

- 990 85. Sreekantan L, Mathason K, Grimpel J, Senlaich K, Dickerson JA et al. (2010) Differential  
991 floral development and gene expression in grapevines during long and short photoperiods suggests  
992 a role for floral genes in dormancy transitioning. *Plant Molecular Biology* 73: 191-205.
- 993 86. Peng M, Cui Y, Bi YM, Rothstein SJ (2006) AtMBD9: a protein with a methyl-CpG-binding  
994 domain regulates flowering time and shoot branching in Arabidopsis. *The Plant Journal* 46: 282-  
995 296.
- 996 87. Huang X, Ouyang X, Yang P, Lau OS, Chen L, et al. (2013) Conversion from CUL4-based  
997 COP1-SPA E3 apparatus to UVR8-COP1-SPA complexes underlies a distinct biochemical function  
998 of COP1 under UV-B. *Proceedings of the National Academy of Sciences of the United States of*  
999 *America* 110: 16669-16674.
- 1000 88. Srivastava AK, Senapati D, Srivastava A, Chakraborty M, Gangappa SN, et al. (2015) Short  
1001 Hypocotyl in White Light1 Interacts with Elongated Hypocotyl5 (HY5) and Constitutive  
1002 Photomorphogenic1 (COP1) and Promotes COP1-Mediated Degradation of HY5 during  
1003 Arabidopsis Seedling Development. *Plant Physiology* 169: 2922-2934.

1004

1005

## 1006 **Bibliography**

### 1007 **Supplementary Figures:**

- 1008 S1 Figure: Illustration of the reproductive developmental cycle of grapevine showing the stages of  
1009 flowering and berry development ([according to 1]). UP: uncommitted primordia.
- 1010 S2 Figure: Flowering periods in days after January 1<sup>st</sup> in the population GF.GA-47-42 x ‘Villard  
1011 Blanc’ in the years 1999 and 2010 – 2016.
- 1012 S3 Figure: Expression profile of the three B-class floral homeotic genes *VvAP3*, *VvTM6* and *VvPI*  
1013 over consecutive developmental stages of bud- and inflorescence development in GF.GA-47-42.  
1014 The last three time points refer to developing stages of visible inflorescence structures.
- 1015 S1 Table: F<sub>1</sub> individuals of the mapping population Gf.Ga-47-42 x Villard blanc and days until full  
1016 bloom after January 1st in the years 1999, 2009, and 2011-2016.



1018 individuals.

1019 S3 Table: Nomenclature system for the alleles of genes.

1020 S4 Table: FTC candidate genes in *Vitis*.

1021 S5 Table: Amplicon sequenced FTC target genes; genomic positions and length of phased intervals.

1022 S6 Table: Molecular marker information.

1023 S7 Table: Correlation analysis with molecular markers for F1 mapping population.

1024 S8 Table: Inflorescence-specific FTC candidate genes.

1025

1026 **Tables:**

1027 Table 1: Dates of flowering periods of the mapping population GF.GA-47-42 x ‘Villard Blanc’ and  
1028 the amount of global radiation at the location of the vineyards (Geilweilerhof) insofar available.

1029 Table 2: Samples collected from grapevine cultivar GF.GA-47-42 for gene expression analysis, the  
1030 developmental stage and the corresponding BBCH code.

1031 Table 3: P-values of the correlation between the E1 allele distribution of *WNK6* and *VvTM6* in  
1032 relation to different sets of phenotypic data using 35 amplicon sequenced F<sub>1</sub> individuals.

1033 Table 4: Comparison of the expected and observed allele sizes (bp) and segregation patterns of  
1034 several FTC target genes.

1035 Table 5: P-values analysis from both the allele phasing workflow and marker analysis.

## Data preparation

amplification of amplicons by PCR

sequencing of amplicons on Illumina-MiSeq platform

bioRxiv preprint doi: <https://doi.org/10.1101/584268>; this version posted March 22, 2019. The copyright holder for this preprint (which was not certified by peer review) is the author/funder, who has granted bioRxiv a license to display the preprint in perpetuity. It is made available under aCC-BY 4.0 International license.

## Preprocessing of data

analysis of read quality (FastQC)

trimming of raw data (trimmomatic 0.36)

## Mapping and processing of mappings

map reads to reference (BWA-MEM 0.7.13)

sort and index alignments (Samtools 1.2)

remove duplicated reads (MarkDuplicates - Picard Tools 1.119)

add sample specific readgroups (AddOrReplaceReadGroups - Picard Tool 1.119)

realign reads around InDels (RealignerTargetCreator, IndelRealigner - GATK 3.5)

recalibrate base quality scores (BaseQualityScoreRecalibrator, PrintReads - GATK 3.5)

## Allele phasing

variant calling (HaplotypeCaller - GATK 3.6)

merge records of population samples (GenotypeGVCFs - GATK 3.6)

filter variants by quality (SelectVariants, FilterVariant, CombineVariants - GATK 3.6)

physical phasing of alleles (extractHAIRS, HAPCUT - HapCUT 0.7)

create alternate allele sequences (python scripts, Blast2Sam - jvarkit, FastaAlternateReferenceMaker - GATK 3.6)

Allele constitution Allele counts and phenotype of F1

P-values  
E-alleles L-alleles

| Chr | Gene     | GF.GA-47-42 | Villard Blanc | E1         | E2         | L1         | L2         | E-alleles    | L-alleles    |
|-----|----------|-------------|---------------|------------|------------|------------|------------|--------------|--------------|
| 1   | WvSEP4   | E1/N2       | L1/N2         | 12 (0.435) | 13 (0.6)   | 12 (0.48)  | 13 (0.69)  | 0.57         | <b>0.044</b> |
| 1   | WvBS2    | E1/E2       | L1/L2         | 17 (0.46)  | 18 (0.61)  | 14 (0.41)  | 21 (0.61)  | 0.23         | <b>0.019</b> |
| 1   | WvHUA2a  | E1/E2       | L1/L2         | 14 (0.41)  | 12 (0.665) | 11 (0.41)  | 15 (0.66)  | 0.076        | <b>0.04</b>  |
| 1   | WvRAV1b  | E0/E0       | L1/L2         | /          | /          | 5 (0.41)   | 12 (0.665) | n.d.         | <b>0.035</b> |
| 1   | WvPFT1a  | E1/E2       | L1/L2         | 13 (0.41)  | 14 (0.665) | 12 (0.48)  | 15 (0.66)  | 0.077        | 0.12         |
| 1   | WvCOL10  | E1/E2       | L1/L2         | 12 (0.41)  | 15 (0.67)  | 12 (0.48)  | 15 (0.66)  | <b>0.018</b> | 0.097        |
| 1   | WvGAI1   | E1/N        | N/L2          | 15 (0.41)  | 10 (0.72)  | 14 (0.41)  | 11 (0.8)   | 0.071        | <b>0.003</b> |
| 1   | WvBRIa   | E1/E2       | L0/L0         | 15 (0.41)  | 17 (0.61)  | /          | /          | <b>0.05</b>  | n.d.         |
| 1   | WvMBD9a  | E1/E2       | L1/L2         | 18 (0.525) | 17 (0.6)   | 19 (0.6)   | 16 (0.475) | 0.45         | 0.2          |
| 1   | WvTCP15b | N1/E2       | N1/L2         | 17 (0.6)   | 16 (0.595) | 18 (0.605) | 15 (0.49)  | 0.66         | 0.66         |
| 1   | WvCDF2a  | E1/E2       | L1/L2         | 17 (0.6)   | 12 (0.575) | 18 (0.605) | 14 (0.52)  | 0.7          | 0.22         |
| 1   | WvbHLH49 | E1/E2       | L1/L2         | 13 (0.49)  | 14 (0.63)  | 12 (0.595) | 15 (0.49)  | 0.44         | 0.77         |
| 1   | WvSCL21a | E1/E2       | L1/L2         | 13 (0.49)  | 13 (0.66)  | 12 (0.595) | 8 (0.45)   | <b>0.049</b> | 0.14         |
| 1   | WvFLC1   | N1/E2       | N1/L2         | 14 (0.41)  | 19 (0.61)  | 19 (0.61)  | 14 (0.475) | 0.053        | 0.49         |
| 4   | WvVIM6   | E1/N2       | L1/N2         | 14 (0.41)  | 16 (0.605) | 19 (0.59)  | 18 (0.605) | <b>0.007</b> | 0.6          |
| 4   | WvWVK6   | E1/N2       | L1/N2         | 25 (0.55)  | 10 (0.725) | 19 (0.61)  | 16 (0.575) | <b>0.007</b> | 0.7          |
| 5   | WvFPA    | E1/E2       | L1/L2         | 7 (0.55)   | 28 (0.6)   | 20 (0.6)   | 15 (0.55)  | 0.54         | 0.26         |
| 6   | WvRAP2a  | Na/Na       | Na/L2         | /          | /          | 15 (0.59)  | 20 (0.6)   | n.d.         | 0.51         |
| 6   | WvGAMYBc | E1/E2       | L1/L2         | 16 (0.57)  | 19 (0.61)  | 27 (0.6)   | 8 (0.625)  | 0.69         | 0.68         |
| 7   | WvCUL1c  | N1/N2       | N1/N2         | /          | /          | /          | /          | n.d.         | n.d.         |
| 7   | WvSPL1b  | E1/E2       | L1/L2         | 21 (0.6)   | 14 (0.55)  | 35 (0.6)   | 0          | 0.46         | n.d.         |
| 8   | WvCDF3b  | Nb/Nb       | L1/Nb         | /          | /          | 17 (0.61)  | 18 (0.505) | n.d.         | 0.22         |
| 8   | ATHB51   | Na/Na       | Na/L2         | /          | /          | 21 (0.56)  | 14 (0.6)   | n.d.         | 0.74         |
| 10  | WvGESa   | E0/E0       | L1/L2         | /          | /          | 19 (0.61)  | 16 (0.555) | n.d.         | 0.31         |
| 11  | WvCOL5   | E1/E2       | L1/L2         | 15 (0.66)  | 19 (0.6)   | 19 (0.59)  | 15 (0.6)   | 0.45         | 0.57         |
| 12  | WvSPB1   | E1/E2       | L1/L2         | 12 (0.58)  | 22 (0.605) | 14 (0.635) | 20 (0.575) | 0.46         | 0.44         |
| 13  | WvPPR37b | E1/E2       | L1/L2         | 14 (0.595) | 14 (0.61)  | 9 (0.6)    | 19 (0.59)  | 0.73         | 0.43         |
| 13  | WvTOE3   | E1/E2       | L1/L2         | 19 (0.56)  | 15 (0.61)  | 12 (0.605) | 22 (0.57)  | 0.23         | 0.94         |
| 14  | WvGID1Ba | E1/E2       | L1/L2         | 6 (0.735)  | 17 (0.56)  | 11 (0.69)  | 12 (0.575) | 0.13         | 0.33         |
| 14  | WvFLKa   | E1/E2       | L1/L2         | 7 (0.67)   | 19 (0.49)  | 15 (0.6)   | 11 (0.55)  | 0.069        | 0.39         |
| 14  | WvGAIb   | E1/E2       | L1/L2         | 12 (0.665) | 16 (0.41)  | 13 (0.69)  | 15 (0.46)  | <b>0.027</b> | 0.059        |
| 14  | WvFUL-L  | E1/E2       | L0/L0         | 12 (0.725) | 13 (0.41)  | /          | /          | <b>0.003</b> | n.d.         |
| 14  | WvSEP1   | N1/E2       | N1/L2         | 12 (0.725) | 11 (0.41)  | 13 (0.69)  | 10 (0.435) | <b>0.034</b> | 0.11         |
| 14  | WvFLC2   | E1/E2       | L1/L2         | 14 (0.635) | 14 (0.4)   | 15 (0.6)   | 13 (0.46)  | <b>0.024</b> | 0.68         |
| 15  | WvAML3   | E0/E0       | L1/L2         | /          | /          | 16 (0.6)   | 18 (0.55)  | n.d.         | 0.31         |
| 16  | WvEMF2a  | N1/E2       | N1/L2         | 14 (0.635) | 22 (0.61)  | 16 (0.6)   | 12 (0.61)  | 0.6          | 0.69         |
| 17  | WvFL     | N0/N0       | N0/N0         | /          | /          | /          | /          | n.d.         | n.d.         |
| 17  | WvMFTa   | E1/E2       | L1/L2         | 13 (0.61)  | 21 (0.55)  | 20 (0.595) | 14 (0.58)  | 0.17         | 0.78         |
| 17  | WvTOC1   | N1/E2       | N1/L2         | 13 (0.61)  | 19 (0.55)  | 20 (0.595) | 22 (0.6)   | 0.15         | 0.52         |
| 17  | WvWERb   | N1/E2       | N1/L2         | 13 (0.61)  | 17 (0.6)   | 20 (0.595) | 14 (0.52)  | 0.28         | 0.27         |
| 17  | WvGAIa   | E1/E2       | L1/L2         | 16 (0.6)   | 18 (0.555) | 14 (0.575) | 19 (0.6)   | 0.68         | 0.82         |
| 18  | WvSVP2   | E1/E2       | L1/L2         | 17 (0.49)  | 17 (0.6)   | 15 (0.41)  | 19 (0.61)  | <b>0.05</b>  | 0.064        |
| 18  | WvCSTF64 | E1/N2       | L1/N2         | 16 (0.6)   | 9 (0.56)   | 10 (0.435) | 15 (0.66)  | 0.32         | <b>0.023</b> |
| Un  | WvMFTb   | E1/N2       | L1/N2         | 1 (0.84)   | 23 (0.59)  | 15 (0.46)  | 9 (0.69)   | 0.19         | 0.074        |
| Un  | WvEMF2e  | N1/E2       | N1/L2         | 1 (0.84)   | 25 (0.6)   | 15 (0.46)  | 13 (0.6)   | 0.44         | 0.47         |

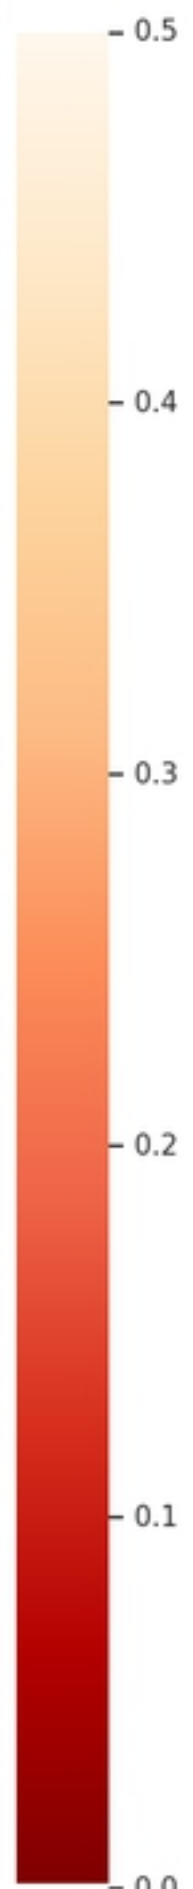

bioRxiv preprint doi: <https://doi.org/10.1101/584268>; this version posted March 22, 2019. The copyright holder for this preprint (which was not certified by peer review) is the author/funder, who has granted bioRxiv a license to display the preprint in perpetuity. It is made available under aCC-BY 4.0 International license.

# F1-individuals: 35

E1/L1:13, E1/N2:12, N2/L1:6, N2/N2:4

E1:25, L1:19, N2:26

### WNK6

- early:10
- intermediate:17
- late:8

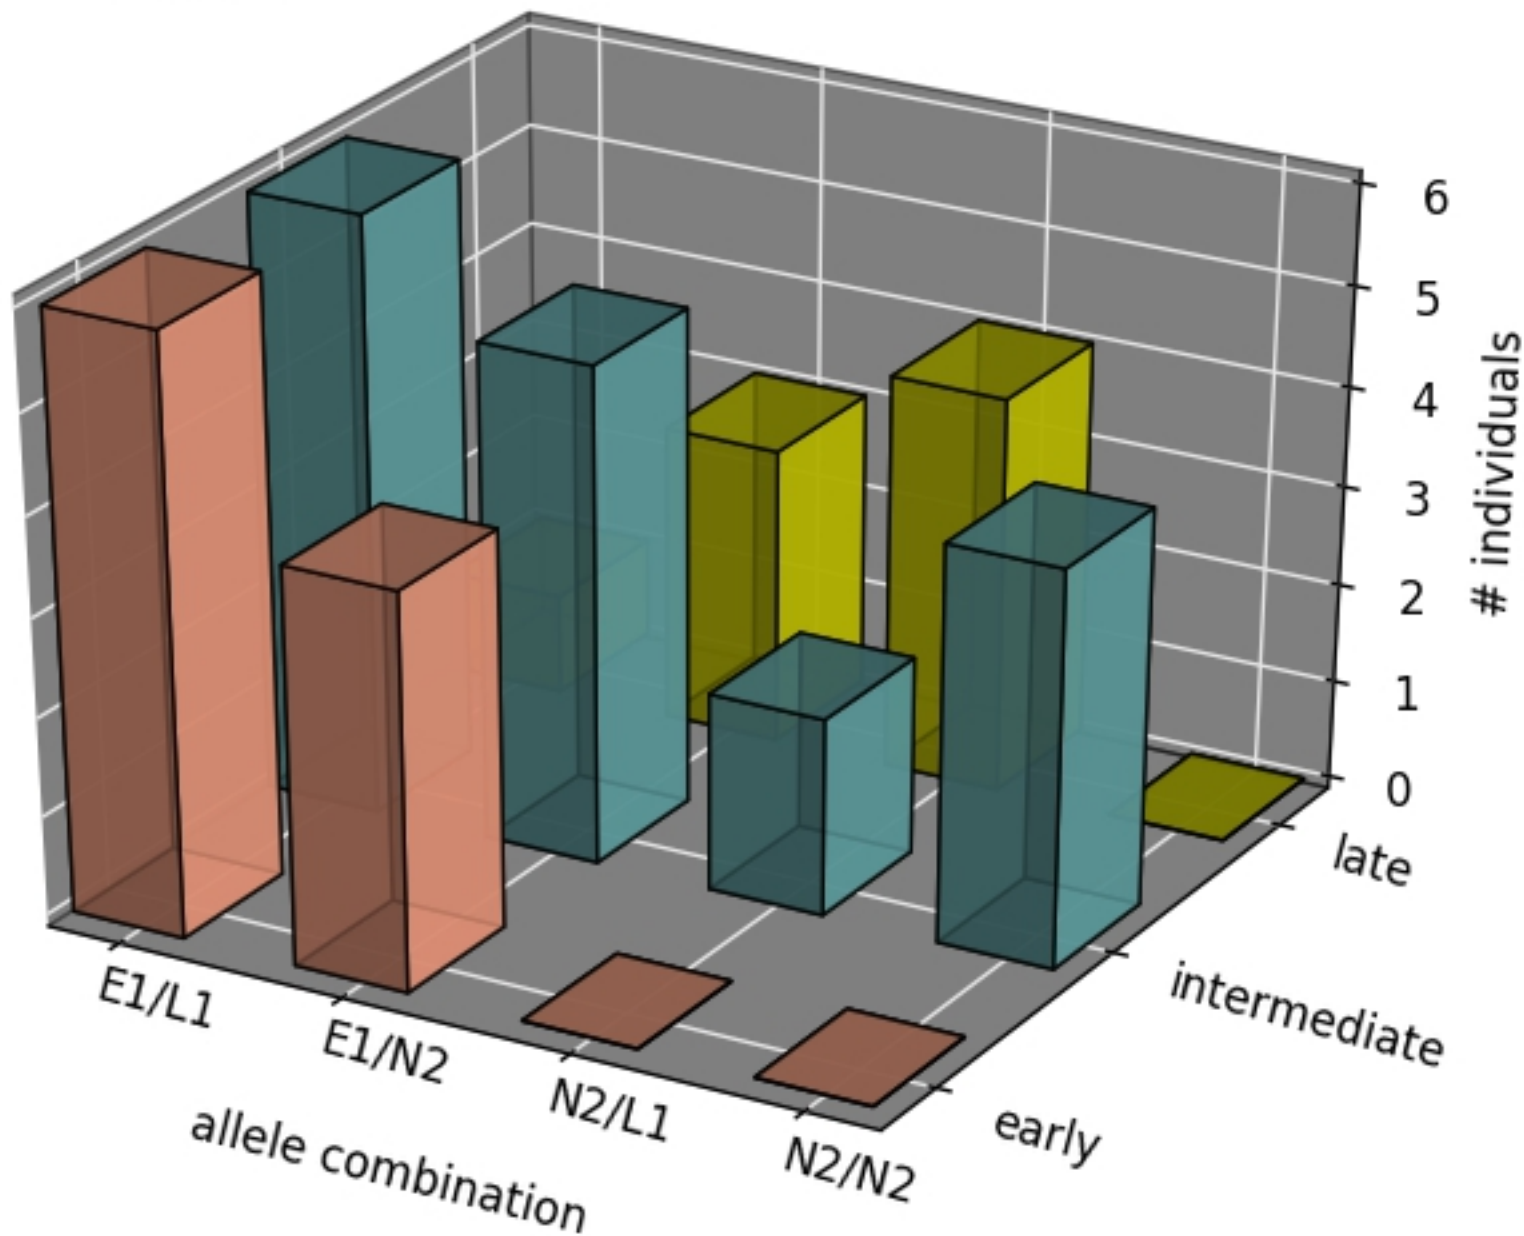

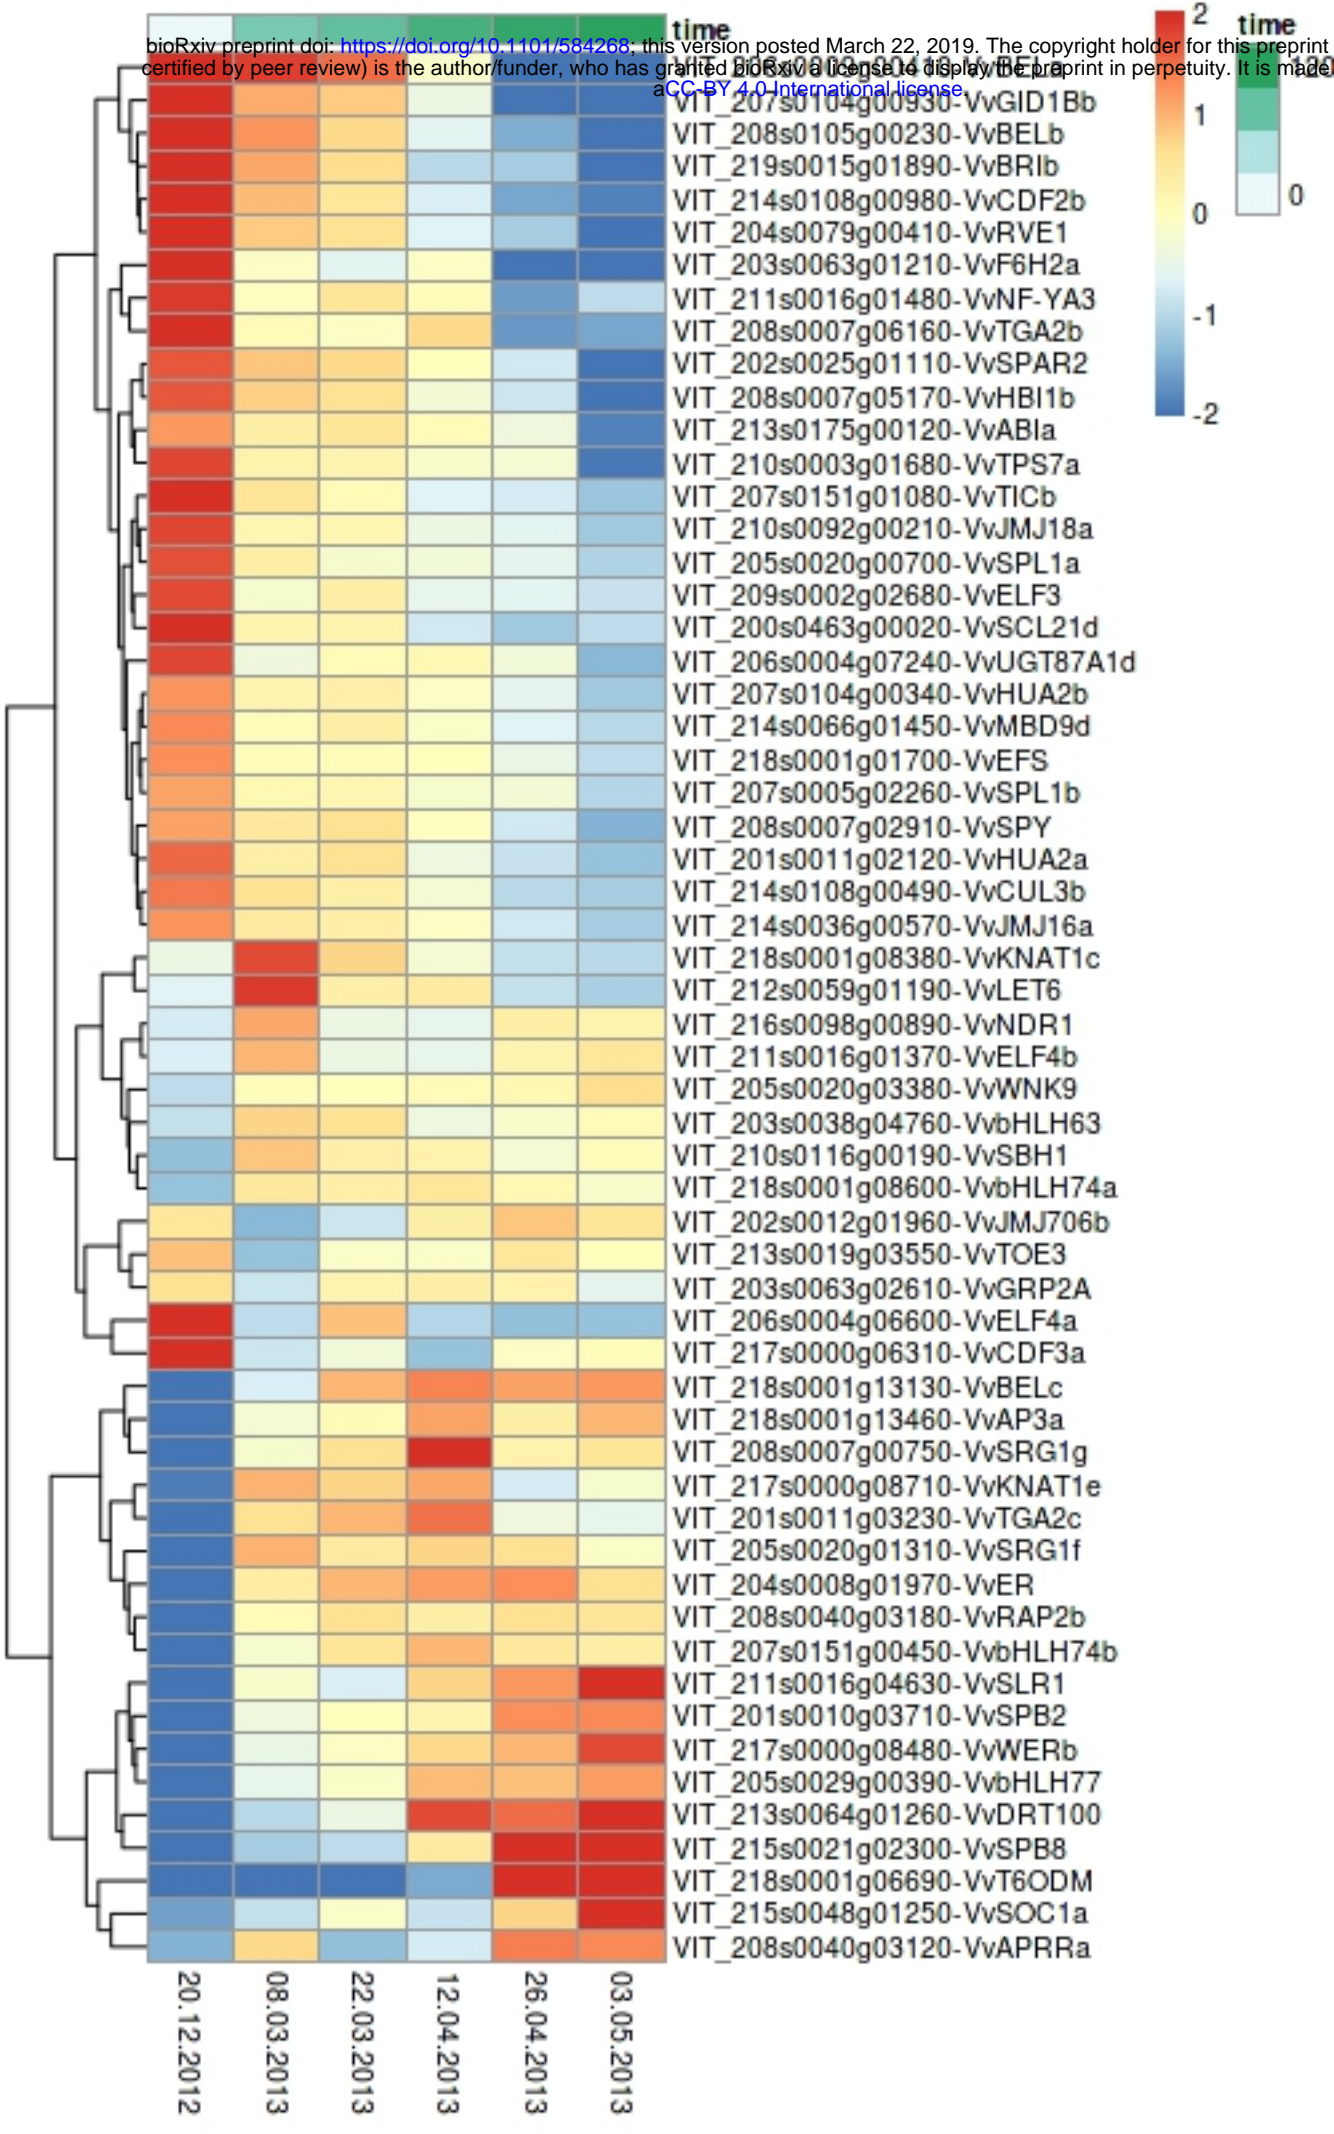

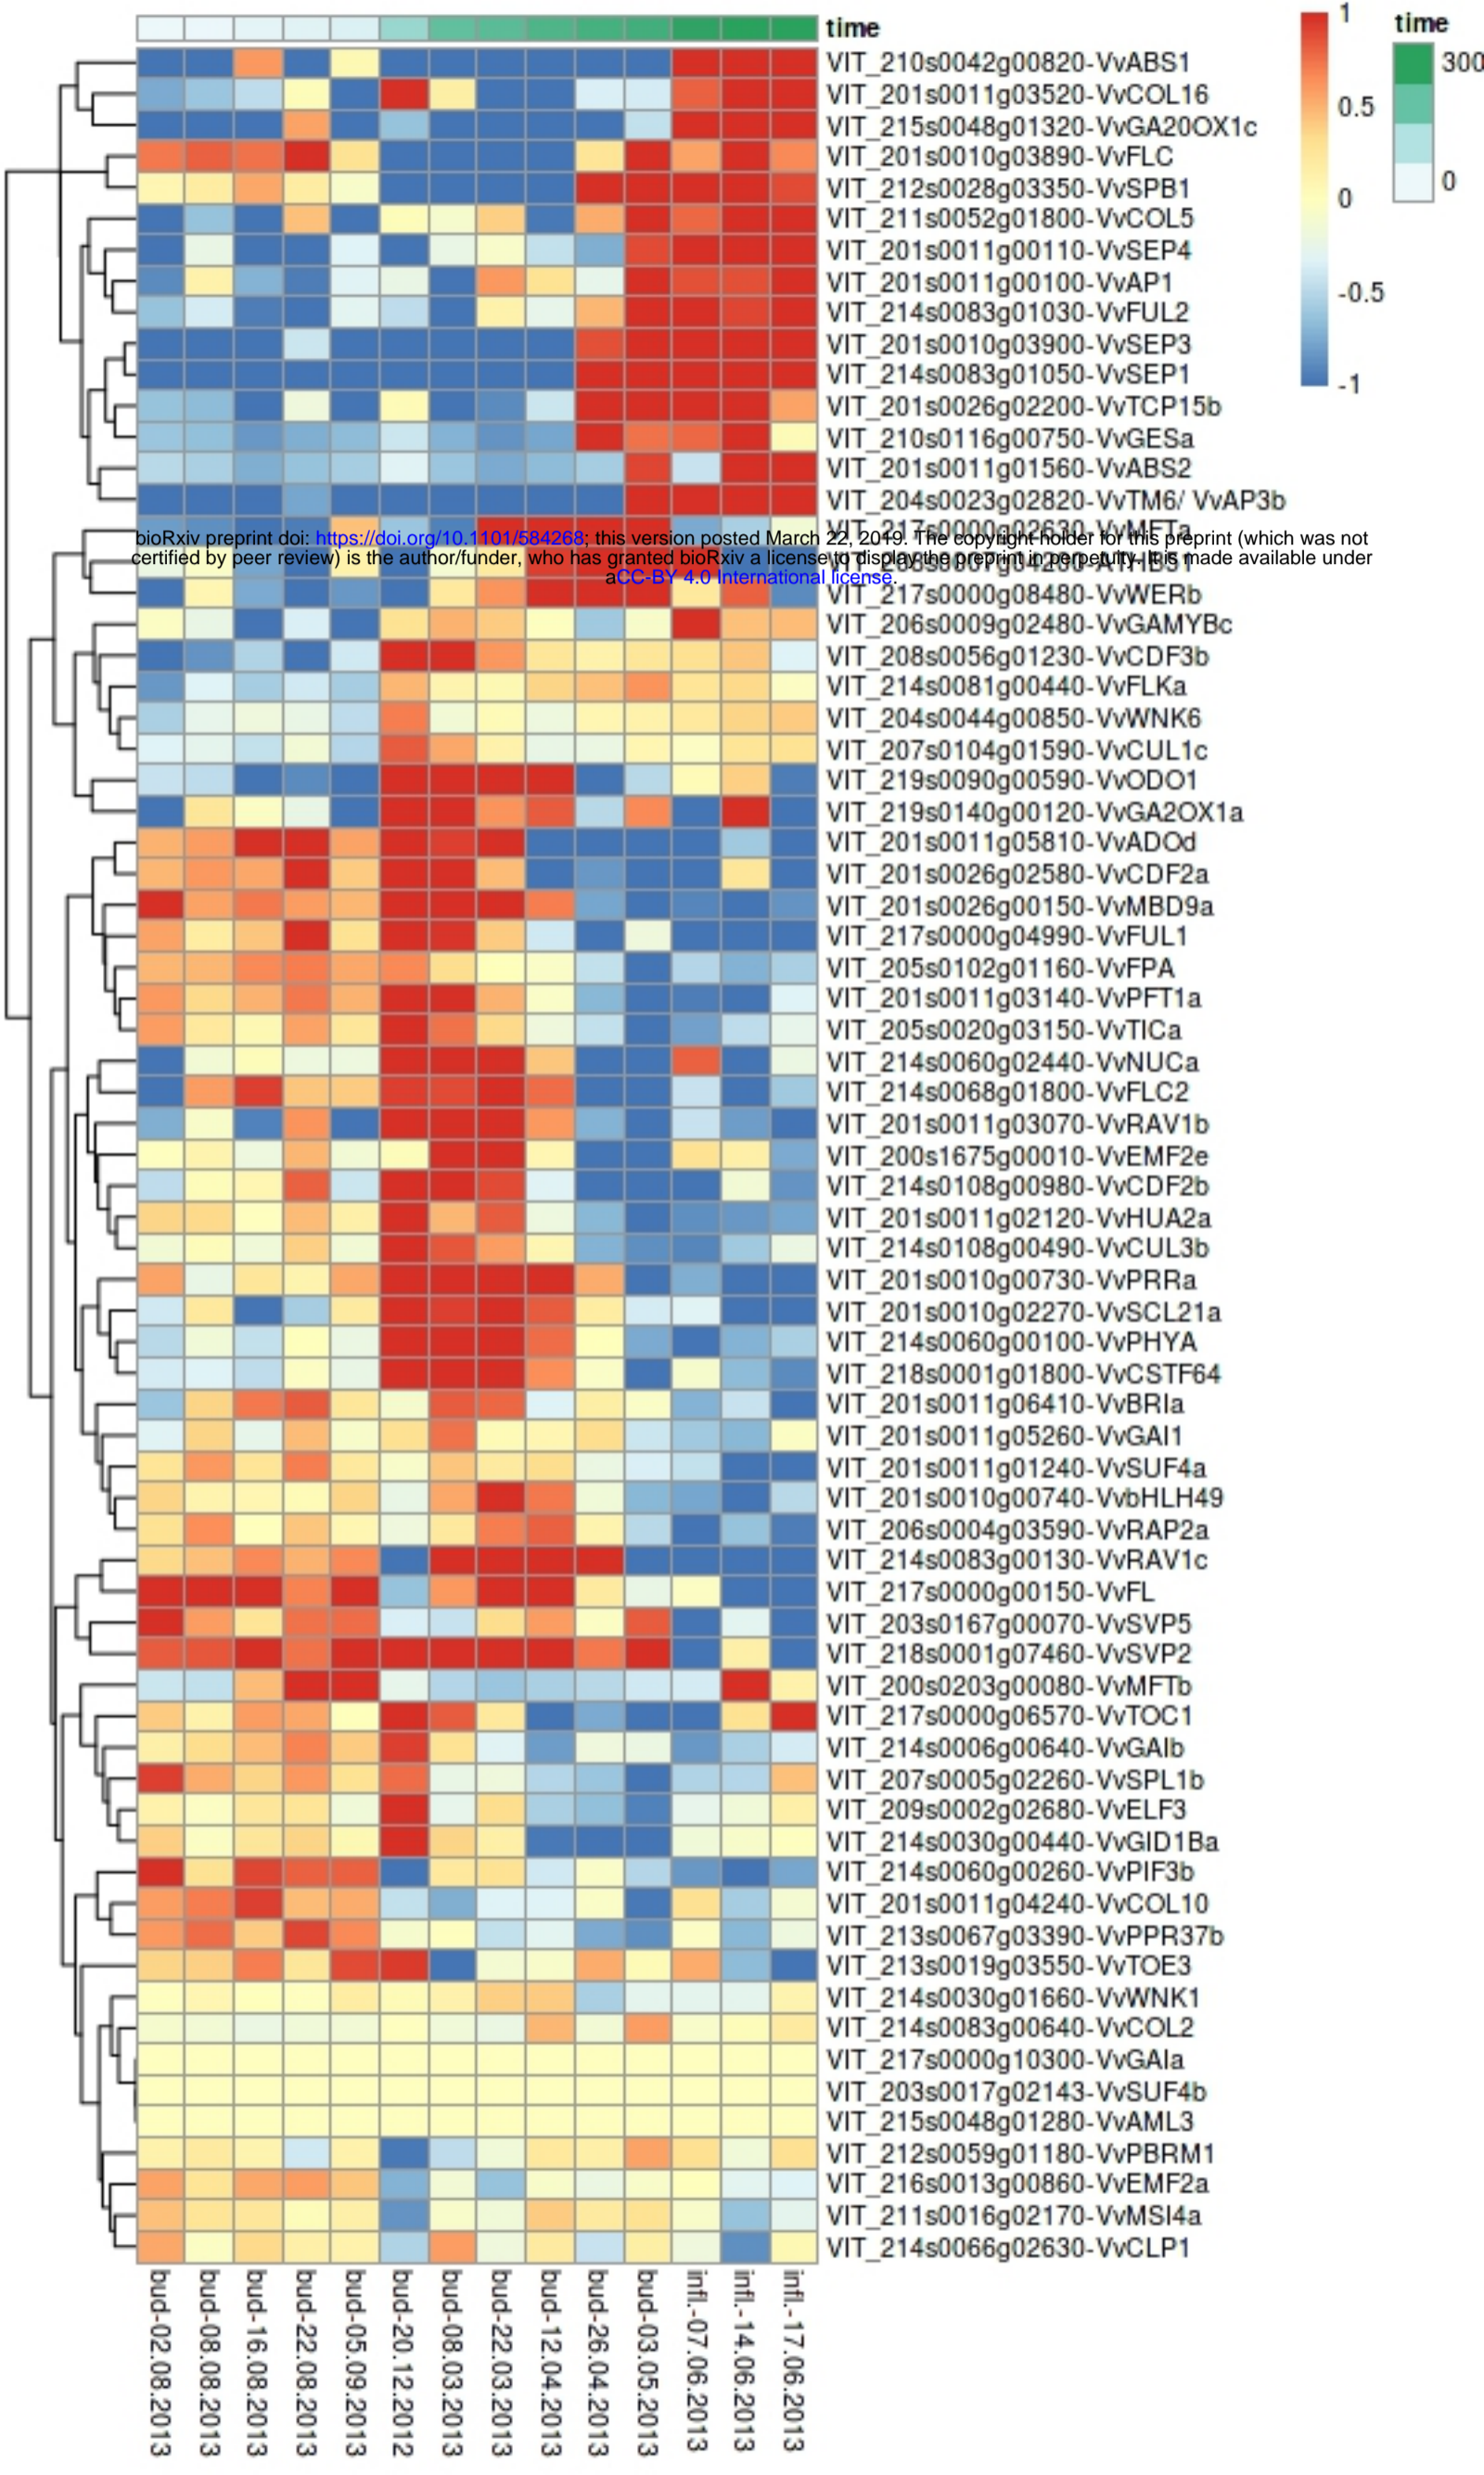

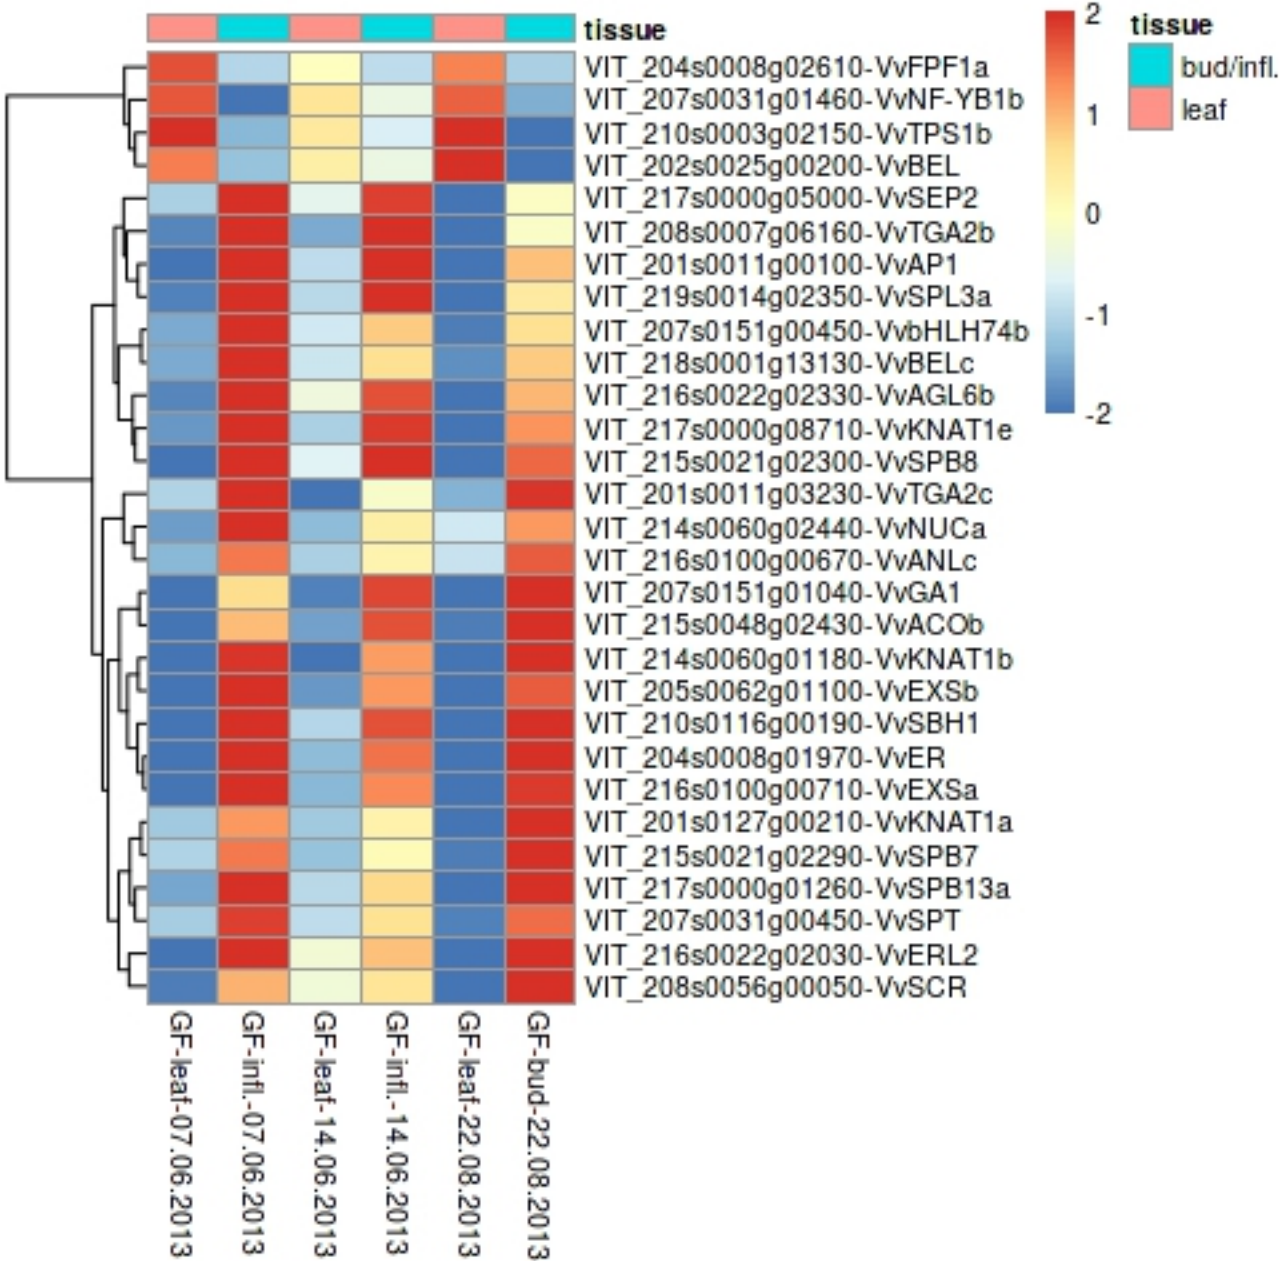

Source: http://biorxiv.org/content/10.1101/584268v1.full.pdf
